# Supplementary material for: Synthesis of polycyclic substituted vinylarenes via a one-pot intramolecular aryl alkylation–N-tosylhydrazone insertion reaction
Source: Royal Society of Chemistry journal article supplement (doi:10.1039/c4cc00809j), 2014-01-01

## Synthesis of Polycyclic Substituted Vinylarenes via a One-Pot Intramolecular Aryl Alkylation/*N*-Tosylhydrazone Insertion Reaction

Xin-Xing Wu, Ping-Xin Zhou, Li-Jing Wang, Peng-Fei Xu\* and Yong-Min Liang\*

State Key Laboratory of Applied Organic Chemistry, Lanzhou University, Lanzhou,  
730000, P.R. China.

Email: liangym@lzu.edu.cn; xupf@lzu.edu.cn

### Supporting Information

#### Table of contents

|          |                                                                                        |                |
|----------|----------------------------------------------------------------------------------------|----------------|
| <b>1</b> | <b>General Remarks</b>                                                                 | <b>S2</b>      |
| <b>2</b> | <b>Optimization of the reaction conditions</b>                                         | <b>S2</b>      |
| <b>3</b> | <b>Preparation of Starting Materials</b>                                               | <b>S3-S5</b>   |
| <b>4</b> | <b>General procedure for the preparation of the products 3</b>                         | <b>S6-S12</b>  |
| <b>5</b> | <b>General procedure for the preparation of the products 5</b>                         | <b>S13-S14</b> |
| <b>6</b> | <b>General procedure for the preparation of the product 6aa</b>                        | <b>S14</b>     |
| <b>7</b> | <b>References</b>                                                                      | <b>S14</b>     |
| <b>8</b> | <b>Crystallographic data of 3o</b>                                                     | <b>S15</b>     |
| <b>9</b> | <b><sup>1</sup>H NMR, <sup>13</sup>C NMR Spectra for products 3a-3x, 5a-5d and 6aa</b> | <b>S16-S44</b> |

## 1. General Remarks

For product purification by flash column chromatography, silica gel (200–300 mesh) and light petroleum ether (bp. 60–90 ) are used. <sup>1</sup>H NMR spectra were recorded on 400 MHz in CDCl<sub>3</sub> and <sup>13</sup>C NMR spectra were recorded on 100 MHz in CDCl<sub>3</sub> using TMS as internal standard. IR spectra were recorded on a FT-IR spectrometer and only major peaks were reported in cm<sup>-1</sup>. Melting points were determined on a microscopic apparatus and were uncorrected. All products were further characterized by HRMS (high resolution mass spectra). Copies of their <sup>1</sup>H NMR and <sup>13</sup>C NMR spectra were provided. dioxane were dried over Na. Commercially available reagents and solvents were used without further purification.

## 2. Optimization of the reaction conditions

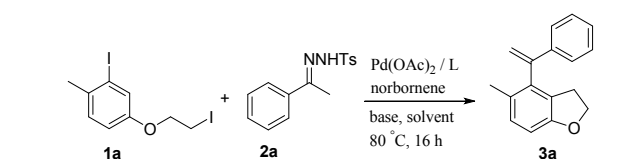

| Entry           | Base                            | Solvent            | Ligand           | Yield, % <sup>b</sup> |
|-----------------|---------------------------------|--------------------|------------------|-----------------------|
| 1               | K <sub>2</sub> CO <sub>3</sub>  | DME                | PPh <sub>3</sub> | 67                    |
| 2               | K <sub>2</sub> CO <sub>3</sub>  | dioxane            | PPh <sub>3</sub> | 71                    |
| 3               | K <sub>2</sub> CO <sub>3</sub>  | THF                | PPh <sub>3</sub> | 60                    |
| 4               | K <sub>2</sub> CO <sub>3</sub>  | CH <sub>3</sub> CN | PPh <sub>3</sub> | 53                    |
| 5               | <i>t</i> -BuOLi                 | dioxane            | PPh <sub>3</sub> | 0                     |
| 6               | Cs <sub>2</sub> CO <sub>3</sub> | DME                | PPh <sub>3</sub> | 70                    |
| 7               | Cs <sub>2</sub> CO <sub>3</sub> | dioxane            | PPh <sub>3</sub> | 74                    |
| 8               | Cs <sub>2</sub> CO <sub>3</sub> | dioxane            | Xphos            | 23                    |
| 9               | Cs <sub>2</sub> CO <sub>3</sub> | dioxane            | TFP              | 55                    |
| 10              | Cs <sub>2</sub> CO <sub>3</sub> | dioxane            | dppe             | 0                     |
| 11              | Cs <sub>2</sub> CO <sub>3</sub> | dioxane            | dppb             | 0                     |
| 12              | Cs <sub>2</sub> CO <sub>3</sub> | dioxane            | -                | 0                     |
| 13 <sup>c</sup> | Cs <sub>2</sub> CO <sub>3</sub> | dioxane            | PPh <sub>3</sub> | 89                    |
| 14 <sup>c</sup> | K <sub>2</sub> CO <sub>3</sub>  | dioxane            | PPh <sub>3</sub> | 80                    |
| 15 <sup>d</sup> | Cs <sub>2</sub> CO <sub>3</sub> | dioxane            | PPh <sub>3</sub> | 84                    |
| 16 <sup>e</sup> | Cs <sub>2</sub> CO <sub>3</sub> | dioxane            | PPh <sub>3</sub> | 61                    |
| 17 <sup>f</sup> | Cs <sub>2</sub> CO <sub>3</sub> | dioxane            | PPh <sub>3</sub> | 0                     |

<sup>a</sup>Reaction conditions : **1a** (0.2 mmol), **2a** (0.4 mmol), Pd(OAc)<sub>2</sub> (10 % mmol), ligand (20 % mmol), base (5.0 equiv.), norbornene (1.0 equiv.), solvent (2 ml), 80 °C, 16 h.

<sup>b</sup>Yield of the isolated product. <sup>c</sup>The reaction was carried out with 5.0 equivalents of H<sub>2</sub>O. <sup>d</sup>The reaction was carried out with 0.5 equivalents of norbornene and 5.0 equivalents of H<sub>2</sub>O.

<sup>e</sup>The reaction was carried out with 0.25 equivalents of norbornene and 5.0 equivalents of H<sub>2</sub>O. <sup>f</sup>The reaction was carried out 5.0 equivalents of H<sub>2</sub>O and without norbornene.

### 3. Preparation of Starting Materials

*N*-tosylhydrazones **2a-2s** were prepared according to a previously reported literature<sup>1</sup>. **1a-1i**, **4a-4d**, **4t** were prepared by literature procedure<sup>2</sup>.

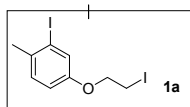

**2-iodo-4-(2-iodoethoxy)-1-methylbenzene (1a)**: <sup>1</sup>H NMR (CDCl<sub>3</sub>, 400MHz) δ: 7.36 (d, *J* = 2.8 Hz, 1H), 7.12 (d, *J* = 8.4 Hz, 1H), 6.81 (dd, *J* = 2.8 Hz, *J* = 8.4 Hz, 1H), 4.19 (t, *J* = 6.8 Hz, 2H), 3.39 (t, *J* = 6.8 Hz, 2H), 2.36 (s, 3H). <sup>13</sup>C NMR (100 MHz, CDCl<sub>3</sub>) δ: 156.1, 134.2, 129.8, 125.0, 114.9, 100.8, 68.9, 26.9, 1.2.

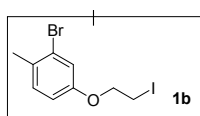

**2-bromo-4-(2-iodoethoxy)-1-methylbenzene (1b)**: <sup>1</sup>H NMR (CDCl<sub>3</sub>, 400MHz) δ: 7.13-7.09 (m, 2H), 6.79-6.75 (m, 1H), 4.25-4.17 (m, 2H), 3.61 (t, *J* = 6.4 Hz, 1H), 3.38 (t, *J* = 6.4 Hz, 1H), 2.32 (s, 3H). <sup>13</sup>C NMR (100 MHz, CDCl<sub>3</sub>) δ: 156.5, 131.1, 130.5, 124.9, 118.6, 114.0, 68.9, 21.9, 0.9.

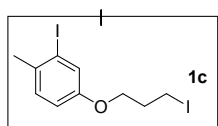

**2-iodo-4-(3-iodopropoxy)-1-methylbenzene (1c)**: <sup>1</sup>H NMR (CDCl<sub>3</sub>, 400MHz) δ: 7.37 (d, *J* = 2.4 Hz, 1H), 7.12 (d, *J* = 8.4 Hz, 1H), 6.81 (dd, *J* = 2.4 Hz, *J* = 8.4 Hz, 1H), 3.99 (t, *J* = 6.4 Hz, 2H), 3.35 (t, *J* = 6.8 Hz, 2H), 2.36 (s, 3H), 2.28-2.22 (m, 2H). <sup>13</sup>C NMR (100 MHz, CDCl<sub>3</sub>) δ: 156.2, 133.6, 129.7, 124.7, 114.7, 100.8, 67.5, 32.8, 26.9, 2.4.

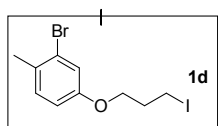

**2-bromo-4-(3-iodopropoxy)-1-methylbenzene (1d)**: <sup>1</sup>H NMR (CDCl<sub>3</sub>, 400MHz) δ: 7.11-7.09 (m, 2H), 6.76-6.73 (m, 1H), 3.96 (t, *J* = 6.0 Hz, 2H), 3.33 (t, *J* = 6.0 Hz, 1H), 2.31 (s, 3H), 2.25-2.19 (m, 2H). <sup>13</sup>C NMR (100 MHz, CDCl<sub>3</sub>) δ: 157.1, 130.9, 129.9, 124.8, 118.2, 113.7, 67.5, 32.7, 21.8, 2.4.

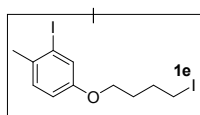

**2-iodo-4-(4-iodobutoxy)-1-methylbenzene (1e)**: <sup>1</sup>H NMR (CDCl<sub>3</sub>, 400MHz) δ: 7.33 (d, *J* = 2.4 Hz, 1H), 7.09 (d, *J* = 8.4 Hz, 1H), 6.77 (dd, *J* = 2.4 Hz, *J* = 8.4 Hz, 1H), 3.93-3.89 (m, 2H), 3.25-3.21 (m, 2H), 2.35 (s, 3H), 2.02-1.95 (m, 2H), 1.90-1.82 (m, 2H). <sup>13</sup>C NMR (100 MHz, CDCl<sub>3</sub>) δ: 156.9, 133.2, 129.6, 124.4, 114.5, 100.8, 66.8, 33.4, 30.0, 26.8, 6.4.

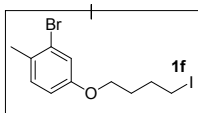

**2-bromo-4-(4-iodobutoxy)-1-methylbenzene (1f):**  $^1\text{H}$  NMR ( $\text{CDCl}_3$ , 400MHz)  $\delta$ : 7.12-7.07 (m, 2H), 6.75-6.73 (m, 1H), 3.95-3.91 (m, 2H), 3.25 (t,  $J = 6.0$  Hz, 2H), 2.31 (s, 3H), 2.06-1.84 (m, 4H).  $^{13}\text{C}$  NMR (100 MHz,  $\text{CDCl}_3$ )  $\delta$ : 157.4, 131.0, 129.7, 124.8, 118.1, 113.8, 66.9, 30.1, 30.0, 21.8, 6.3.

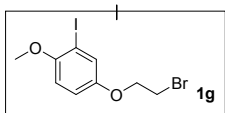

**4-(2-bromoethoxy)-2-iodo-1-methoxybenzene (1g):**  $^1\text{H}$  NMR ( $\text{CDCl}_3$ , 400MHz)  $\delta$ : 7.36 (d,  $J = 3.2$  Hz, 1H), 6.80 (dd,  $J = 3.2$  Hz,  $J = 8.8$  Hz, 1H), 6.73 (d,  $J = 8.8$  Hz, 1H), 4.21 (t,  $J = 6.4$  Hz, 2H), 3.82 (s, 3H), 3.60 (d,  $J = 6.4$  Hz, 2H).  $^{13}\text{C}$  NMR (100 MHz,  $\text{CDCl}_3$ )  $\delta$ : 153.1, 152.4, 126.0, 115.7, 111.2, 85.9, 68.7, 56.8, 29.1.

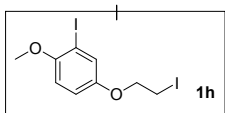

**2-iodo-4-(2-iodoethoxy)-1-methoxybenzene (1h):**  $^1\text{H}$  NMR ( $\text{CDCl}_3$ , 400MHz)  $\delta$ : 7.36-7.35 (m, 1H), 6.90-6.87 (m, 1H), 6.76-6.73 (m, 1H), 4.23-4.15 (m, 2H), 3.83 (s, 3H), 3.60 (d,  $J = 6.0$  Hz, 1H), 3.38 (d,  $J = 6.0$  Hz, 1H).  $^{13}\text{C}$  NMR (100 MHz,  $\text{CDCl}_3$ )  $\delta$ : 153.1, 152.3, 126.1, 115.8, 111.3, 85.9, 69.5, 56.8, 1.2.

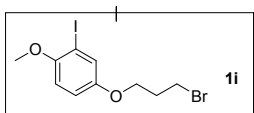

**4-(3-bromopropoxy)-2-iodo-1-methoxybenzene (1i):**  $^1\text{H}$  NMR ( $\text{CDCl}_3$ , 400MHz)  $\delta$ : 7.35 (d,  $J = 2.8$  Hz, 1H), 6.87 (dd,  $J = 9.2$  Hz,  $J = 2.8$  Hz, 1H), 6.75 (d,  $J = 9.2$  Hz, 1H), 4.03 (t,  $J = 5.6$  Hz, 2H), 3.83 (s, 3H), 3.60 (d,  $J = 6.4$  Hz, 2H), 2.31-2.25 (m, 2H).  $^{13}\text{C}$  NMR (100 MHz,  $\text{CDCl}_3$ )  $\delta$ : 153.2, 152.8, 125.6, 115.3, 111.4, 85.9, 66.0, 56.9, 32.2, 30.0.

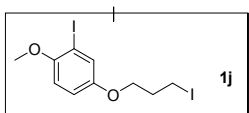

**2-iodo-4-(3-iodopropoxy)-1-methoxybenzene (1j):**  $^1\text{H}$  NMR ( $\text{CDCl}_3$ , 400MHz)  $\delta$ : 7.35 (d,  $J = 3.2$  Hz, 1H), 6.87 (dd,  $J = 3.2$  Hz,  $J = 8.8$  Hz, 1H), 6.75 (d,  $J = 8.8$  Hz, 1H), 3.96 (t,  $J = 5.6$  Hz, 2H), 3.83 (s, 3H), 3.35 (d,  $J = 5.6$  Hz, 2H), 2.26-2.20 (m, 2H).  $^{13}\text{C}$  NMR (100 MHz,  $\text{CDCl}_3$ )  $\delta$ : 153.2, 152.8, 125.6, 115.3, 111.4, 86.0, 68.0, 56.9, 32.8, 2.6.

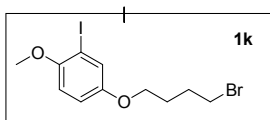

**4-(4-bromobutoxy)-2-iodo-1-methoxybenzene (1k):**  $^1\text{H}$  NMR ( $\text{CDCl}_3$ , 400MHz)  $\delta$ : 7.33 (d,  $J = 2.8$  Hz, 1H), 6.84 (dd,  $J = 2.8$  Hz,  $J = 8.8$  Hz, 1H), 6.73 (d,  $J = 8.8$  Hz, 1H), 3.91 (t,  $J = 6.0$  Hz, 2H), 3.81 (s, 3H), 3.47 (d,  $J = 6.0$  Hz, 2H), 2.07-2.00 (m, 2H), 1.93-1.86 (2H).  $^{13}\text{C}$  NMR (100 MHz,  $\text{CDCl}_3$ )  $\delta$ : 153.3, 152.5, 125.4, 115.1, 111.4, 85.9, 67.5, 56.8, 33.4, 29.3, 27.7.

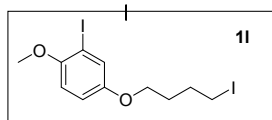

**2-iodo-4-(4-iodobutoxy)-1-methoxybenzene (1l):**  $^1\text{H}$  NMR ( $\text{CDCl}_3$ , 400MHz)  $\delta$ : 7.33 (d,  $J = 2.8$  Hz, 1H), 6.87-6.83 (m, 1H), 6.74 (d,  $J = 8.8$  Hz, 1H), 3.93-3.89 (m, 2H), 3.82 (s, 3H), 3.26 (d,  $J = 6.8$  Hz, 2H), 2.05-1.97 (m, 2H), 1.90-1.85 (m, 2H).  $^{13}\text{C}$  NMR (100 MHz,  $\text{CDCl}_3$ )  $\delta$ : 153.4, 152.7, 125.4, 115.3, 111.4, 86.0, 67.4, 56.9, 30.1, 30.0, 6.5.

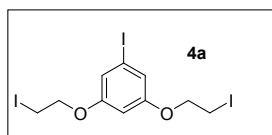

**1-iodo-3,5-bis(2-iodoethoxy)benzene (4a):**  $^1\text{H}$  NMR ( $\text{CDCl}_3$ , 400MHz)  $\delta$ : 6.88 (dd,  $J = 2.4$  Hz,  $J = 6.0$  Hz, 2H), 6.43 (dd,  $J = 2.4$  Hz,  $J = 4.4$  Hz, 1H), 4.25-4.17 (m, 4H), 3.62 (t,  $J = 6.0$  Hz, 2H), 3.39 (t,  $J = 6.8$  Hz, 2H).  $^{13}\text{C}$  NMR (100 MHz,  $\text{CDCl}_3$ )  $\delta$ : 159.5, 117.1, 102.0, 94.1, 68.0, 0.6

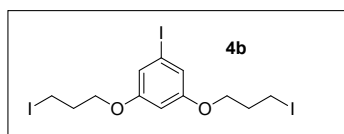

**1-iodo-3,5-bis(3-iodopropoxy)benzene (4b):**  $^1\text{H}$  NMR ( $\text{CDCl}_3$ , 400MHz)  $\delta$ : 6.86 (d,  $J = 2.0$  Hz, 2H), 6.41 (dd,  $J = 2.4$  Hz,  $J = 2.0$  Hz, 1H), 3.98 (t,  $J = 6.0$  Hz, 4H), 3.34 (t,  $J = 6.0$  Hz, 4H), 4.24 (dd,  $J = 6.0$  Hz, 4H).  $^{13}\text{C}$  NMR (100 MHz,  $\text{CDCl}_3$ )  $\delta$ : 160.0, 116.4, 101.4, 94.1, 67.4, 32.6, 2.4.

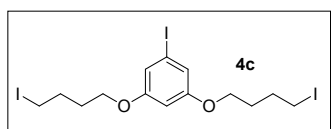

**1-iodo-3,5-bis(4-iodobutoxy)benzene (4c):**  $^1\text{H}$  NMR ( $\text{CDCl}_3$ , 400MHz)  $\delta$ : 6.83 (d,  $J = 2.0$  Hz, 2H), 6.37 (t,  $J = 5$  Hz, 1H), 3.92 (t,  $J = 6.0$  Hz, 4H), 3.24 (t,  $J = 6.8$  Hz, 4H), 2.05-1.96 (m, 4H), 1.90-1.83 (m, 4H).  $^{13}\text{C}$  NMR (100 MHz,  $\text{CDCl}_3$ )  $\delta$ : 160.2, 116.2, 101.3, 94.1, 66.8, 29.9, 29.8, 6.4.

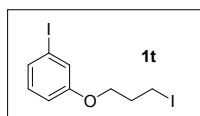

**1-iodo-3-(3-iodopropoxy)benzene (1t):**  $^1\text{H}$  NMR ( $\text{CDCl}_3$ , 400MHz)  $\delta$ : 7.29-7.25 (m, 2H), 7.00 (t,  $J = 8.0$  Hz, 1H), 6.88-6.85 (m, 1H), 3.99 (t,  $J = 6.0$  Hz, 2H), 3.35 (t,  $J = 6.8$  Hz, 2H), 2.25 (dd,  $J = 6.0$  Hz,  $J = 6.8$  Hz, 2H).  $^{13}\text{C}$  NMR (100 MHz,  $\text{CDCl}_3$ )  $\delta$ : 159.1, 130.8, 130.0, 123.5, 114.1, 94.4, 67.3, 32.7, 2.4.

#### 4. General procedure for the preparation of the products 3

**1** (0.2 mmol), **2** (0.4 mmol), Pd(OAc)<sub>2</sub> (4.5 mg, 10 mol %), PPh<sub>3</sub> (10.5 mg, 20 mol %), norbornene (18.8 mg, 0.2 mmol, 1 equiv), Cs<sub>2</sub>CO<sub>3</sub> (326 mg, 1 mmol, 5 equiv), H<sub>2</sub>O (5equiv) were dissolved in 2 mL of degassed dry dioxane. The mixture was flushed with N<sub>2</sub> and stirred at room temperature for 15 minutes, then heated at 80 °C for 16 h. After cooling at room temperature, the mixture was diluted with diethyl ether, washed with water, dried over magnesium sulfate, and purified by flash chromatography (silica, petroleum ether/AcOEt).

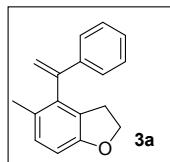

**5-methyl-4-(1-phenylvinyl)-2,3-dihydrobenzofuran (3a):** oil; <sup>1</sup>H NMR (CDCl<sub>3</sub>, 400MHz) δ: 7.32-7.26 (m, 5H), 6.97 (d, *J* = 8.0 Hz, 1H), 6.68 (d, *J* = 8.0 Hz, 1H), 5.88 (d, *J* = 1.2 Hz, 1H), 5.17 (d, *J* = 1.2 Hz, 1H), 4.48 (t, *J* = 8.8 Hz, 2H), 2.94 (t, *J* = 8.8 Hz, 2H), 2.06 (s, 3H). <sup>13</sup>C NMR (100 MHz, CDCl<sub>3</sub>) δ: 157.8, 146.4, 139.2, 138.4, 133.8, 133.6, 129.2, 128.4, 127.8, 127.7, 126.3, 126.0, 114.5, 107.9, 71.2, 29.4, 18.9. IR (neat) 397, 2951, 2923, 2869, 1594, 1493, 1456, 1233, 986, 807, 706. HRMS-ESI (m/z) [M + H]<sup>+</sup> calcd for C<sub>17</sub>H<sub>17</sub>O: 237.1274; Found, 237.1274.

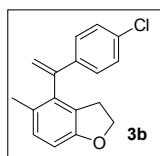

**4-(1-(4-chlorophenyl)vinyl)-5-methyl-2,3-dihydrobenzofuran (3b):** oil; <sup>1</sup>H NMR (CDCl<sub>3</sub>, 400MHz) δ: 7.26-7.19 (m, 4H), 6.97 (d, *J* = 8.0 Hz, 1H), 6.68 (d, *J* = 8.0 Hz, 1H), 5.87 (s, 1H), 5.18 (s, 1H), 4.49 (t, *J* = 8.8 Hz, 2H), 2.93 (t, *J* = 8.8 Hz, 2H), 2.04 (s, 3H). <sup>13</sup>C NMR (100 MHz, CDCl<sub>3</sub>) δ: 157.9, 145.3, 137.8, 137.7, 133.5, 129.4, 128.6, 127.7, 127.3, 126.2, 115.0, 108.1, 71.2, 29.4, 18.9. IR (neat) 3374, 2954, 2923, 1592, 1490, 1233, 1095, 908, 838, 734. HRMS-ESI (m/z) [M + H]<sup>+</sup> calcd for C<sub>17</sub>H<sub>16</sub>ClO: 271.0884; Found, 271.0883.

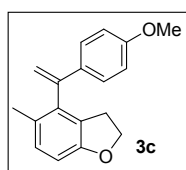

**4-(1-(4-methoxyphenyl)vinyl)-5-methyl-2,3-dihydrobenzofuran (3c):** oil; <sup>1</sup>H NMR (CDCl<sub>3</sub>, 400MHz) δ: 7.21 (d, *J* = 8.8 Hz, 2H), 6.97 (d, *J* = 8.0 Hz, 1H), 6.82 (d, *J* = 8.8 Hz, 2H), 6.67 (d, *J* = 8.0 Hz, 1H), 5.78 (d, *J* = 1.2Hz, 1H), 5.05 (d, *J* = 1.2Hz, 1H), 4.49 (t, *J* = 8.8 Hz, 2H), 3.80 (s, 3H), 2.95 (t, *J* = 8.8 Hz, 2H), 2.06 (s, 3H). <sup>13</sup>C NMR (100 MHz, CDCl<sub>3</sub>) δ: 159.3, 157.8, 145.7, 138.7, 131.8, 129.2, 127.8, 127.2, 126.3, 113.8, 112.4, 107.8, 71.2, 55.2, 29.4, 18.9. IR (neat) 3396, 2924, 1604, 1510, 1458, 1295, 1248, 1034, 986, 837, 808. HRMS-ESI (m/z) [M + H]<sup>+</sup> calcd for C<sub>18</sub>H<sub>19</sub>O<sub>2</sub>: 267.1380; Found, 267.1382.

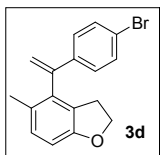

**4-(1-(4-bromophenyl)vinyl)-5-methyl-2,3-dihydrobenzofuran (3d):** oil;  $^1\text{H NMR}$  ( $\text{CDCl}_3$ , 400MHz)  $\delta$ : 7.40 (d,  $J = 8.0$  Hz, 2H), 7.14 (d,  $J = 8.0$  Hz, 2H), 6.97 (d,  $J = 8.0$  Hz, 1H), 6.69 (d,  $J = 8.0$  Hz, 1H), 5.88 (d,  $J = 0.8$  Hz, 1H), 5.19 (d,  $J = 0.8$  Hz, 1H), 4.50 (t,  $J = 8.8$  Hz, 2H), 2.93 (t,  $J = 8.8$  Hz, 2H), 2.04 (s, 3H).  $^{13}\text{C NMR}$  (100 MHz,  $\text{CDCl}_3$ )  $\delta$ : 157.9, 145.4, 138.2, 137.7, 131.6, 129.4, 127.8, 127.6, 126.3, 121.8, 115.1, 108.1, 71.2, 29.4, 18.9. IR (neat) 3370, 2953, 2924, 1737, 1592, 1508, 1456, 1388, 1232, 1009, 835, 734. HRMS-ESI ( $m/z$ ) [ $M + H$ ] $^+$  calcd for  $\text{C}_{17}\text{H}_{16}\text{BrO}$ : 315.0379; Found, 315.0381.

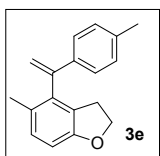

**5-methyl-4-(1-(p-tolyl)vinyl)-2,3-dihydrobenzofuran (3e):** oil;  $^1\text{H NMR}$  ( $\text{CDCl}_3$ , 400MHz)  $\delta$ : 7.17 (d,  $J = 8.0$  Hz, 2H), 7.08 (d,  $J = 8.0$  Hz, 2H), 6.96 (d,  $J = 8.0$  Hz, 1H), 6.67 (d,  $J = 8.0$  Hz, 1H), 5.84 (d,  $J = 1.2$  Hz, 1H), 5.11 (d,  $J = 1.2$  Hz, 1H), 4.8 (t,  $J = 8.8$  Hz, 2H), 2.94 (t,  $J = 8.8$  Hz, 2H), 2.33 (s, 3H), 2.06 (s, 3H).  $^{13}\text{C NMR}$  (100 MHz,  $\text{CDCl}_3$ )  $\delta$ : 157.7, 146.2, 138.6, 137.6, 136.3, 129.2, 129.1, 127.8, 126.3, 125.9, 113.5, 107.8, 71.2, 29.4, 21.1, 18.9. IR (neat) 3386, 2952, 1593, 1511, 1457, 1439, 1232, 986, 908, 827, 807, 734. HRMS-ESI ( $m/z$ ) [ $M + H$ ] $^+$  calcd for  $\text{C}_{18}\text{H}_{19}\text{O}$ : 251.1430; Found, 251.1426.

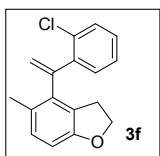

**4-(1-(2-chlorophenyl)vinyl)-5-methyl-2,3-dihydrobenzofuran (3f):** oil;  $^1\text{H NMR}$  ( $\text{CDCl}_3$ , 400MHz)  $\delta$ : 7.38-7.35 (m, 1H), 7.20-7.18 (m, 3H), 6.93 (d,  $J = 8.0$  Hz, 1H), 6.64 (d,  $J = 8.0$  Hz, 1H), 5.80 (d,  $J = 1.2$  Hz, 1H), 5.50 (d,  $J = 1.2$  Hz, 1H), 4.47 (t,  $J = 8.8$  Hz, 2H), 2.94 (t,  $J = 8.8$  Hz, 2H), 2.13 (s, 3H).  $^{13}\text{C NMR}$  (100 MHz,  $\text{CDCl}_3$ )  $\delta$ : 157.9, 144.3, 139.8, 138.4, 132.4, 130.9, 130.3, 129.7, 128.4, 127.7, 126.6, 126.2, 121.8, 108.1, 71.2, 29.9, 19.6. IR (neat) 3391, 2924, 2370, 1590, 1470, 1457, 1259, 1236, 1044, 909, 734. HRMS-ESI ( $m/z$ ) [ $M + H$ ] $^+$  calcd for  $\text{C}_{17}\text{H}_{16}\text{ClO}$ : 271.0884; Found, 271.0883.

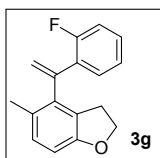

**4-(1-(2-fluorophenyl)vinyl)-5-methyl-2,3-dihydrobenzofuran (3g):** oil;  $^1\text{H NMR}$  ( $\text{CDCl}_3$ , 400MHz)  $\delta$ : 7.24-7.18 (m, 1H), 7.08-7.00 (m, 3H), 6.95 (d,  $J = 8.0$  Hz, 1H), 6.66 (d,  $J = 8.0$  Hz, 1H), 5.96 (s, 1H), 5.42 (s, 1H), 4.49 (t,  $J = 8.8$  Hz, 2H), 2.97 (t,  $J = 8.8$  Hz, 2H), 2.09 (s, 3H).  $^{13}\text{C NMR}$  (100 MHz,  $\text{CDCl}_3$ )  $\delta$ : 161.7, 159.3, 157.8, 141.2, 138.6, 130.1, 130.0, 129.3, 129.0, 127.6, 127.5, 126.1, 124.0, 123.9, 120.2, 120.1, 116.2, 116.0, 108.0, 71.2, 29.4, 19.0. IR (neat) 3395, 2951, 2924, 1606, 1593, 1487, 1455, 1218, 986, 920, 807, 755. HRMS-ESI ( $m/z$ ) [ $M + H$ ] $^+$  calcd for  $\text{C}_{17}\text{H}_{16}\text{FO}$ : 255.1180; Found, 255.1176.

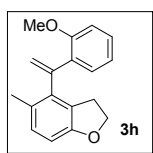

**4-(1-(2-methoxyphenyl)vinyl)-5-methyl-2,3-dihydrobenzofuran (3h):** oil;  $^1\text{H}$  NMR ( $\text{CDCl}_3$ , 400MHz)  $\delta$ : 7.24-7.20 (m, 1H), 7.05 (d,  $J = 8.0$  Hz, 1H), 6.93-6.84 (m, 3H), 6.62 (d,  $J = 8.0$  Hz, 1H), 5.91 (d,  $J = 2.0$  Hz, 1H), 5.32 (d,  $J = 2.0$  Hz, 1H), 4.47 (t,  $J = 8.4$  Hz, 2H), 3.71 (s, 3H), 2.96 (t,  $J = 8.4$  Hz, 2H), 2.10 (s, 3H).  $^{13}\text{C}$  NMR (100 MHz,  $\text{CDCl}_3$ )  $\delta$ : 157.6, 157.5, 144.0, 139.9, 130.2, 129.5, 129.1, 128.6, 127.6, 126.0, 120.5, 119.2, 111.5, 107.4, 71.2, 55.5, 29.6, 19.1. IR (neat) 3384, 2951, 2870, 1595, 1490, 1457, 1243, 1027, 908, 753. HRMS-ESI ( $m/z$ ) [ $M + H$ ] $^+$  calcd for  $\text{C}_{18}\text{H}_{19}\text{O}_2$ : 267.1380; Found, 267.1385.

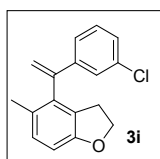

**4-(1-(3-chlorophenyl)vinyl)-5-methyl-2,3-dihydrobenzofuran (3i):** oil;  $^1\text{H}$  NMR ( $\text{CDCl}_3$ , 400MHz)  $\delta$ : 7.28-7.22 (m, 3H), 7.14-7.11 (m, 1H), 6.98 (d,  $J = 8.0$  Hz, 1H), 6.69 (d,  $J = 8.0$  Hz, 1H), 5.89 (s, 1H), 5.22 (s, 1H), 4.51 (t,  $J = 8.8$  Hz, 2H), 2.94 (t,  $J = 8.8$  Hz, 2H), 2.05 (s, 3H).  $^{13}\text{C}$  NMR (100 MHz,  $\text{CDCl}_3$ )  $\delta$ : 157.9, 145.4, 141.2, 137.6, 134.5, 129.7, 129.4, 127.8, 127.7, 126.3, 126.0, 124.3, 115.9, 108.2, 71.2, 29.4, 19.0. IR (neat) 3383, 2923, 2853, 1738, 1592, 1457, 1233, 1078, 907, 792. HRMS-ESI ( $m/z$ ) [ $M + H$ ] $^+$  calcd for  $\text{C}_{17}\text{H}_{16}\text{ClO}$ : 271.0884; Found, 271.0885.

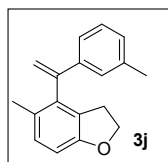

**5-methyl-4-(1-(m-tolyl)vinyl)-2,3-dihydrobenzofuran (3j):** oil;  $^1\text{H}$  NMR ( $\text{CDCl}_3$ , 400MHz)  $\delta$ : 7.19-7.15 (m, 1H), 7.11-7.04 (m, 3H), 6.97 (d,  $J = 8.0$  Hz, 1H), 6.68 (d,  $J = 8.0$  Hz, 1H), 5.86 (d,  $J = 1.2$  Hz, 1H), 5.14 (d,  $J = 1.2$  Hz, 1H), 4.49 (t,  $J = 8.8$  Hz, 2H), 3.71 (s, 3H), 2.95 (t,  $J = 8.8$  Hz, 2H), 2.31 (s, 3H), 2.06 (s, 3H).  $^{13}\text{C}$  NMR (100 MHz,  $\text{CDCl}_3$ )  $\delta$ : 157.7, 146.5, 139.2, 138.5, 138.0, 129.2, 128.5, 128.3, 127.9, 126.5, 126.3, 123.3, 114.4, 107.8, 71.2, 29.4, 21.5, 19.0. IR (neat) 3383, 2953, 2922, 1596, 1456, 1440, 1299, 1234, 986, 906, 796. HRMS-ESI ( $m/z$ ) [ $M + H$ ] $^+$  calcd for  $\text{C}_{17}\text{H}_{19}\text{O}$ : 251.1430; Found, 251.1430.

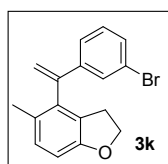

**4-(1-(3-bromophenyl)vinyl)-5-methyl-2,3-dihydrobenzofuran (3k):** oil;  $^1\text{H}$  NMR ( $\text{CDCl}_3$ , 400MHz)  $\delta$ : 7.46 (s, 1H), 7.39 (s, 1H), 7.16 (s, 2H), 6.98 (d,  $J = 8.0$  Hz, 1H), 6.69 (d,  $J = 8.0$  Hz, 1H), 5.89 (s, 1H), 5.22 (s, 1H), 4.51 (t,  $J = 8.8$  Hz, 2H), 2.94 (t,  $J = 8.8$  Hz, 2H), 2.05 (s, 3H).  $^{13}\text{C}$  NMR (100 MHz,  $\text{CDCl}_3$ )  $\delta$ : 157.9, 145.2, 141.5, 137.5, 130.7, 130.0, 129.4, 128.9, 127.7, 126.3, 124.8, 122.8, 115.9, 108.2, 71.2, 29.4, 19.0. IR (neat) 3385, 2953, 2923,



1590, 1558, 1456, 1295, 1233, 986, 907, 733, 671. HRMS-ESI (m/z) [M + H]<sup>+</sup> calcd for C<sub>17</sub>H<sub>16</sub>BrO: 315.0379; Found, 315.0382.

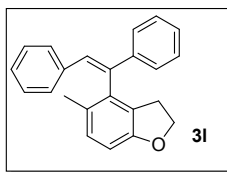

**4-(1,2-diphenylvinyl)-5-methyl-2,3-dihydrobenzofuran (3l):** oil; <sup>1</sup>H NMR (CDCl<sub>3</sub>, 400MHz) δ: 7.34-7.26 (m, 5H), 7.18-7.12 (m, 3H), 7.08 (s, 1H), 7.02-6.99 (m, 3H), 6.73 (d, *J* = 8.0 Hz, 1H), 4.44-4.34 (m, 2H), 2.80-2.64 (m, 2H), 1.97 (s, 3H). <sup>13</sup>C NMR (100 MHz, CDCl<sub>3</sub>) δ: 158.3, 141.0, 138.9, 137.1, 136.5, 129.8, 128.5, 128.4, 128.3, 128.2, 128.1, 127.5, 127.2, 126.3, 126.1, 108.2, 71.2, 29.2, 18.8. IR (neat) 3386, 2955, 2922, 2855, 1595, 1492, 1455, 1233, 981, 767, 695. HRMS-ESI (m/z) [M + H]<sup>+</sup> calcd for C<sub>23</sub>H<sub>21</sub>O: 313.1587; Found, 313.1589.

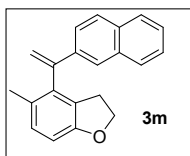

**5-methyl-4-(1-(naphthalen-2-yl)vinyl)-2,3-dihydrobenzofuran (3m):** oil; <sup>1</sup>H NMR (CDCl<sub>3</sub>, 400MHz) δ: 8.30 (d, *J* = 2.0 Hz, 1H), 7.88 (d, *J* = 2.0 Hz, 1H), 7.76 (d, *J* = 8.0 Hz, 1H), 7.50-7.43 (m, 2H), 7.41-7.35 (m, 1H), 7.25-7.22 (t, 1H), 6.98 (d, *J* = 8.0 Hz, 1H), 6.66 (d, *J* = 8.0 Hz, 1H), 5.79 (d, *J* = 1.2 Hz, 1H), 5.64 (d, *J* = 1.2 Hz, 1H), 4.42 (t, *J* = 8.8 Hz, 1H), 2.87 (t, *J* = 8.8 Hz, 1H), 2.18 (s, 3H). <sup>13</sup>C NMR (100 MHz, CDCl<sub>3</sub>) δ: 158.0, 145.1, 139.2, 134.0, 131.0, 129.9, 128.6, 127.8, 127.6, 126.2, 126.0, 125.6, 125.5, 125.1, 121.3, 108.0, 71.2, 30.0, 19.8. IR (neat) 3049, 2952, 1847, 1590, 1458, 1264, 1232, 1057, 807, 781, 738. HRMS-ESI (m/z) [M + H]<sup>+</sup> calcd for C<sub>21</sub>H<sub>19</sub>O: 287.1430; Found, 287.1430.

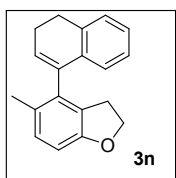

**4-(3,4-dihydronaphthalen-1-yl)-5-methyl-2,3-dihydrobenzofuran (3n):** oil; <sup>1</sup>H NMR (CDCl<sub>3</sub>, 400MHz) δ: 7.20-7.11 (m, 2H), 7.06-7.02 (m, 1H), 6.98 (d, *J* = 8.0 Hz, 1H), 6.68 (d, *J* = 8.0 Hz, 1H), 6.63 (d, *J* = 8.0 Hz, 1H), 5.92 (m, 1H), 4.54-4.44 (m, 2H), 3.11-3.03 (m, 1H), 2.91-2.79 (m, 3H), 2.46-2.41 (m, 2H), 2.05 (s, 3H). <sup>13</sup>C NMR (100 MHz, CDCl<sub>3</sub>) δ: 157.7, 137.0, 136.9, 136.0, 134.2, 129.0, 128.4, 127.5, 127.4, 127.0, 126.7, 126.5, 124.2, 107.7, 71.2, 29.3, 28.1, 23.2, 18.8. IR (neat) 3382, 3018, 2933, 2830, 1594, 1457, 1236, 984, 909, 734. HRMS-ESI (m/z) [M + H]<sup>+</sup> calcd for C<sub>19</sub>H<sub>19</sub>O: 263.1430; Found, 263.1429.

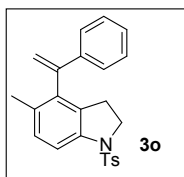

**5-methyl-4-(1-phenylvinyl)-1-tosylindoline (3o):** solid; m.p. 64-66 °C; <sup>1</sup>H NMR (CDCl<sub>3</sub>, 400MHz) δ: 7.64 (d, *J*

= 8.0 Hz, 2H), 7.52 (d,  $J$  = 8.0 Hz, 1H), 7.26-7.22 (m, 5H), 7.11-7.07 (m, 3H), 5.83 (d,  $J$  = 0.8 Hz, 1H), 5.02 (d,  $J$  = 0.8 Hz, 1H), 3.84 (t,  $J$  = 8.0 Hz, 2H), 2.53 (s, 2H), 2.39 (s, 3H), 2.06 (s, 3H).  $^{13}\text{C}$  NMR (100 MHz,  $\text{CDCl}_3$ )  $\delta$ : 143.8, 139.7, 138.7, 138.4, 134.2, 132.0, 131.6, 129.5, 129.3, 128.4, 127.8, 127.3, 125.8, 114.6, 114.5, 50.2, 27.4, 21.6, 19.1. IR(neat) 3378, 2955, 2869, 1618, 1579, 1452, 1353, 1167, 909, 814. HRMS-ESI ( $m/z$ )  $[\text{M} + \text{H}]^+$  calcd for  $\text{C}_{24}\text{H}_{24}\text{O}_2\text{NS}$ : 390.1522; Found, 390.1521.

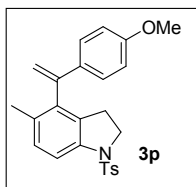

**4-(1-(4-methoxyphenyl)vinyl)-5-methyl-1-tosylindoline (3p)**: solid; m.p. 87-89 °C;  $^1\text{H}$  NMR ( $\text{CDCl}_3$ , 400MHz)  $\delta$ : 7.64 (d,  $J$  = 8.4 Hz, 2H), 7.51 (d,  $J$  = 8.4 Hz, 1H), 7.26-7.23 (m, 2H), 7.09-7.02 (m, 3H), 6.77-6.73 (m, 2H), 5.72 (d,  $J$  = 0.8 Hz, 1H), 4.90 (d,  $J$  = 0.8 Hz, 1H), 3.84 (t,  $J$  = 8.4 Hz, 2H), 3.78 (s, 3H), 2.53(d,  $J$  = 11.2 Hz, 2H), 2.40 (s, 3H), 2.07 (s, 3H).  $^{13}\text{C}$  NMR (100 MHz,  $\text{CDCl}_3$ )  $\delta$ : 159.3, 145.0, 143.8, 139.7, 138.7, 134.2, 132.0, 131.5, 129.5, 129.3, 127.4, 127.0, 114.4, 113.7, 112.5, 55.2, 50.2, 27.4, 21.6, 19.0. IR (neat) 3385, 2956, 2853, 2055, 1602, 1510, 1455, 1352, 1249, 1164, 1031, 906, 815, 618. HRMS-ESI ( $m/z$ )  $[\text{M} + \text{H}]^+$  calcd for  $\text{C}_{25}\text{H}_{26}\text{O}_3\text{NS}$ : 420.1628; Found, 420.1626.

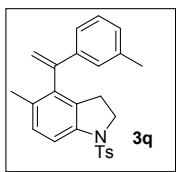

**5-methyl-4-(1-(m-tolyl)vinyl)-1-tosylindoline (3q)**: oil;  $^1\text{H}$  NMR ( $\text{CDCl}_3$ , 400MHz)  $\delta$ : 7.65 (d,  $J$  = 8.0 Hz, 2H), 7.52 (d,  $J$  = 8.0 Hz, 1H), 7.25-7.22 (m, 2H), 7.10-7.04 (m, 3H), 6.98 (s, 1H), 6.84 (d,  $J$  = 8.0 Hz, 1H), 5.82 (s, 1H), 5.00 (s, 1H), 3.84 (t,  $J$  = 8.0 Hz, 2H), 2.54 (s, 2H), 2.38 (s, 3H), 2.27 (s, 3H), 2.06 (s, 3H).  $^{13}\text{C}$  NMR (100 MHz,  $\text{CDCl}_3$ )  $\delta$ : 145.7, 143.8, 139.7, 138.7, 138.6, 138.0, 134.2, 132.0, 131.4, 129.5, 129.3, 128.6, 128.3, 127.3, 126.3, 123.0, 114.5, 114.3, 50.1, 27.4, 21.5, 21.4, 19.1. IR (neat) 3384, 1598, 1454, 1354, 1167, 1092, 674. HRMS-ESI ( $m/z$ )  $[\text{M} + \text{H}]^+$  calcd for  $\text{C}_{25}\text{H}_{26}\text{O}_2\text{NS}$ : 426.1498; Found, 426.1496.

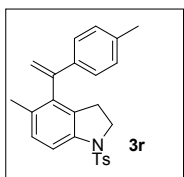

**5-methyl-4-(1-(p-tolyl)vinyl)-1-tosylindoline (3r)**: oil;  $^1\text{H}$  NMR ( $\text{CDCl}_3$ , 400MHz)  $\delta$ : 7.64 (d,  $J$  = 8.0 Hz, 2H), 7.51 (d,  $J$  = 8.0 Hz, 1H), 7.26-7.22 (m, 2H), 7.09-6.98 (m, 5H), 5.79 (s, 1H), 4.96 (s, 1H), 3.84 (t,  $J$  = 8.0 Hz, 2H), 2.51 (m, 2H), 2.39 (s, 3H), 2.31 (s, 3H), 2.07 (s, 3H).  $^{13}\text{C}$  NMR (100 MHz,  $\text{CDCl}_3$ )  $\delta$ : 145.4, 143.8, 139.7, 138.6, 137.7, 135.8, 134.2, 132.0, 131.6, 129.5, 129.4, 129.3, 129.1, 127.3, 125.7, 114.5, 113.6, 50.2, 27.4, 21.6, 21.1, 19.1. IR (neat) 3381, 2953, 2923, 1598, 1511, 1454, 1354, 1166, 1093, 907, 815, 671. HRMS-ESI ( $m/z$ )  $[\text{M} + \text{H}]^+$  calcd for  $\text{C}_{25}\text{H}_{26}\text{O}_2\text{NS}$ : 404.1679; Found, 404.1677.

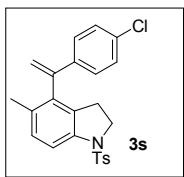

**4-(1-(4-chlorophenyl)vinyl)-5-methyl-1-tosylindoline (3s):** oil;  $^1\text{H NMR}$  ( $\text{CDCl}_3$ , 400MHz)  $\delta$ : 7.64 (d,  $J = 8.0$  Hz, 2H), 7.52 (d,  $J = 8.0$  Hz, 1H), 7.26-7.23 (m, 2H), 7.20-7.18 (m, 2H), 7.08 (d,  $J = 8.0$  Hz, 1H), 7.02 (d,  $J = 8.0$  Hz, 2H), 5.83 (s, 1H), 5.05 (s, 1H), 3.85 (t,  $J = 8.0$  Hz, 2H), 2.50 (m, 2H), 2.40 (s, 3H), 2.06 (s, 3H).  $^{13}\text{C NMR}$  (100 MHz,  $\text{CDCl}_3$ )  $\delta$ : 144.5, 143.9, 139.9, 138.6, 137.9, 137.2, 134.2, 133.7, 131.9, 131.5, 129.6, 129.4, 128.6, 127.3, 127.1, 115.1, 114.7, 50.1, 27.4, 21.6, 19.0. IR (neat) 3383, 2922, 1597, 1491, 1354, 1166, 1092, 815, 587. HRMS-ESI ( $m/z$ ) [ $\text{M} + \text{H}$ ] $^+$  calcd for  $\text{C}_{24}\text{H}_{23}\text{ClO}_2\text{NS}$ : 446.0952; Found, 446.0958.

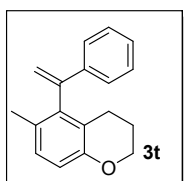

**6-methyl-5-(1-phenylvinyl)chroman (3t):** oil;  $^1\text{H NMR}$  ( $\text{CDCl}_3$ , 400MHz)  $\delta$ : 7.29-7.25 (m, 5H), 6.98 (d,  $J = 8.0$  Hz, 1H), 6.73 (d,  $J = 8.0$  Hz, 1H), 5.98 (s, 1H), 5.11 (s, 1H), 4.10 (t,  $J = 5.6$  Hz, 2H), 2.77-2.69 (m, 1H), 2.33-2.26 (m, 2H), 2.09-2.07 (m, 4H), 1.92-1.83 (m, 2H).  $^{13}\text{C NMR}$  (100 MHz,  $\text{CDCl}_3$ )  $\delta$ : 152.9, 146.2, 141.4, 139.0, 128.5, 128.3, 127.7, 127.6, 125.7, 120.5, 115.5, 114.5, 65.9, 23.2, 22.5, 19.3. IR (neat) 3379, 2949, 2869, 1593, 1492, 1467, 1379, 1250, 1069, 813, 707. HRMS-ESI ( $m/z$ ) [ $\text{M} + \text{H}$ ] $^+$  calcd for  $\text{C}_{18}\text{H}_{19}\text{O}$ : 251.1431; Found, 251.1430.

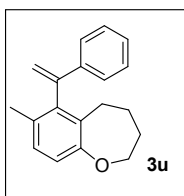

**7-methyl-6-(1-phenylvinyl)-2,3,4,5-tetrahydrobenzo[b]oxepine (3u):** oil;  $^1\text{H NMR}$  ( $\text{CDCl}_3$ , 400MHz)  $\delta$ : 7.28-7.24 (m, 5H), 6.98 (d,  $J = 8.0$  Hz, 1H), 6.91 (d,  $J = 8.0$  Hz, 1H), 5.96 (d,  $J = 0.8$  Hz, 1H), 5.07 (d,  $J = 0.8$  Hz, 1H), 4.09-3.90 (m, 2H), 2.78-2.66 (m, 2H), 2.08 (s, 3H), 1.92-1.86 (m, 2H), 1.51-1.44 (m, 2H).  $^{13}\text{C NMR}$  (100 MHz,  $\text{CDCl}_3$ )  $\delta$ : 158.9, 146.8, 141.2, 139.5, 134.5, 131.4, 128.4, 128.3, 128.1, 127.7, 125.9, 119.9, 114.4, 73.8, 32.4, 29.8, 25.9, 20.0. IR (neat) 3394, 2925, 2867, 1585, 1493, 1474, 1445, 1238, 1037, 906, 704. HRMS-ESI ( $m/z$ ) [ $\text{M} + \text{H}$ ] $^+$  calcd for  $\text{C}_{19}\text{H}_{21}\text{O}$ : 265.1587; Found, 265.1588.

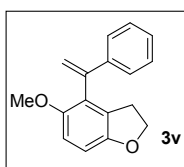

**5-methoxy-4-(1-phenylvinyl)-2,3-dihydrobenzofuran (3v):** oil;  $^1\text{H NMR}$  ( $\text{CDCl}_3$ , 400MHz)  $\delta$ : 7.33-7.24 (m, 5H), 6.71 (s, 1H), 5.88 (d,  $J = 1.2$  Hz, 1H), 5.26 (d,  $J = 1.2$  Hz, 1H), 4.49 (t,  $J = 8.8$  Hz, 2H), 3.62 (s, 3H), 2.96 (t,  $J = 8.8$  Hz, 2H).  $^{13}\text{C NMR}$  (100 MHz,  $\text{CDCl}_3$ )  $\delta$ : 153.8, 151.5, 143.9, 139.7, 128.4, 128.2, 127.9, 127.5, 126.0, 115.4, 111.1, 107.7, 71.7, 56.9, 29.6. IR (neat) 3400, 2926, 1603, 1458, 1326, 1227, 1072, 988, 781. HRMS-ESI ( $m/z$ ) [ $\text{M}$

+ H]<sup>+</sup> calcd for C<sub>17</sub>H<sub>17</sub>O<sub>2</sub>: 253.1223; Found, 253.1222.

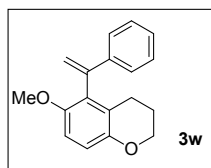

**6-methoxy-5-(1-phenylvinyl)chroman (3w):** oil; <sup>1</sup>H NMR (CDCl<sub>3</sub>, 400MHz) δ: 7.32-7.23 (m, 5H), 6.78 (d, *J* = 3.2 Hz, 2H), 5.97 (d, *J* = 0.8 Hz, 1H), 5.16 (d, *J* = 0.8 Hz, 1H), 4.08 (s, 2H), 3.65 (s, 3H), 2.73 (d, *J* = 4.0 Hz, 1H), 2.32 (s, 1H), 1.87 (d, *J* = 4.0 Hz, 2H). <sup>13</sup>C NMR (100 MHz, CDCl<sub>3</sub>) δ: 150.8, 149.1, 143.5, 139.4, 130.8, 128.3, 127.5, 125.8, 121.9, 115.8, 115.2, 110.8, 65.9, 56.6, 23.1, 22.3. IR (neat) 3082, 2930, 2869, 1619, 1478, 1441, 1243, 1192, 1086, 1029, 954, 805, 705. HRMS-ESI (m/z) [M + H]<sup>+</sup> calcd for C<sub>18</sub>H<sub>19</sub>O<sub>2</sub>: 267.1380; Found, 267.1378.

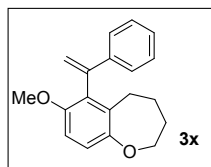

**7-methoxy-6-(1-phenylvinyl)-2,3,4,5-tetrahydrobenzo[b]oxepine (3x):** oil; <sup>1</sup>H NMR (CDCl<sub>3</sub>, 400MHz) δ: 7.31-7.23 (m, 5H), 6.99 (d, *J* = 8.0 Hz, 1H), 6.69 (d, *J* = 8.0 Hz, 1H), 5.97 (t, *J* = 0.8 Hz, 1H), 5.11 (t, *J* = 0.8 Hz, 1H), 4.08-3.90 (m, 2H), 3.65 (s, 3H), 2.75-2.71 (m, 2H), 1.93-1.87 (m, 2H), 1.51 (d, *J* = 7.2 Hz, 2H). <sup>13</sup>C NMR (100 MHz, CDCl<sub>3</sub>) δ: 154.7, 153.1, 144.1, 140.0, 136.2, 130.6, 128.3, 128.2, 127.4, 126.6, 125.9, 120.3, 115.0, 108.9, 74.0, 56.2, 32.4, 29.5, 25.9. IR (neat) 3384, 2929, 2855, 1618, 1493, 1476, 1265, 1234, 1065, 999, 903, 780. HRMS-ESI (m/z) [M + H]<sup>+</sup> calcd for C<sub>19</sub>H<sub>21</sub>O<sub>2</sub>: 281.1536; Found, 281.1532.

## 5. General procedure for the preparation of the products 5

**4** (0.2 mmol), **2** (0.4 mmol), Pd(OAc)<sub>2</sub> (4.5 mg, 10 mol %), PPh<sub>3</sub> (10.5 mg, 20 mol %), norbornene (37.6 mg, 0.4 mmol, 2 equiv), Cs<sub>2</sub>CO<sub>3</sub> (326 mg, 1 mmol, 5 equiv), H<sub>2</sub>O (5equiv) were dissolved in 4 mL of degassed dry dioxane. The mixture was flushed with N<sub>2</sub> and stirred at room temperature for 15 minutes, then heated at 80 °C for 16 h. After cooling at room temperature, the mixture was diluted with diethyl ether, washed with water, dried over magnesium sulfate, and purified by flash chromatography (silica, petroleum ether/AcOEt).

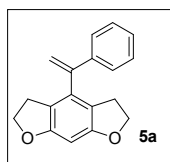

**4-(1-phenylvinyl)-2,3,5,6-tetrahydrobenzo[1,2-b:5,4-b']difuran (5a)**: solid; m.p. 112-114 °C; <sup>1</sup>H NMR (CDCl<sub>3</sub>, 400MHz) δ: 7.31 (s, 5H), 6.30 (s, 1H), 5.78 (d, *J* = 0.8 Hz, 1H), 5.27 (t, *J* = 0.8 Hz, 1H), 4.50 (t, *J* = 8.4 Hz, 4H), 2.83 (t, *J* = 8.4 Hz, 4H). <sup>13</sup>C NMR (100 MHz, CDCl<sub>3</sub>) δ: 160.3, 146.2, 139.4, 134.6, 128.4, 127.8, 126.6, 117.4, 115.1, 91.8, 72.1, 28.7. IR (neat) 3378, 2922, 2853, 1598, 1438, 1242, 1156, 1060, 781, 702. HRMS-ESI (m/z) [M + H]<sup>+</sup> calcd for C<sub>18</sub>H<sub>17</sub>O<sub>2</sub>: 265.1223; Found, 265.1220.

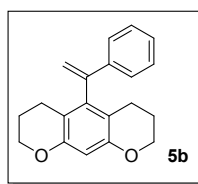

**5-(1-phenylvinyl)-2,3,4,6,7,8-hexahydropyrano[3,2-g]chromene (5b)**: solid; m.p. 104-106 °C; <sup>1</sup>H NMR (CDCl<sub>3</sub>, 400MHz) δ: 7.30-7.26 (m, 5H), 6.33 (s, 1H), 5.97 (s, 1H), 5.12 (s, 1H), 4.09 (m, 4H), 2.70-2.62 (m, 2H), 2.28-2.21 (m, 2H), 1.90-1.82 (m, 4H). <sup>13</sup>C NMR (100 MHz, CDCl<sub>3</sub>) δ: 153.8, 145.3, 141.8, 138.7, 128.5, 127.8, 125.6, 114.6, 113.2, 103.3, 66.1, 22.6. IR (neat) 3379, 2923, 2376, 1594, 1461, 1260, 1105, 800, 619. HRMS-ESI (m/z) [M + H]<sup>+</sup> calcd for C<sub>20</sub>H<sub>21</sub>O<sub>2</sub>: 293.1536; Found, 293.1534.

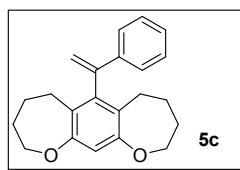

**6-(1-phenylvinyl)-2,3,4,5,7,8,9,10-octahydrobenzo[1,2-b:5,4-b']bis(oxepine) (5c)**: oil; <sup>1</sup>H NMR (CDCl<sub>3</sub>, 400MHz) δ: 7.28 (d, *J* = 5.6 Hz, 5H), 6.70 (s, 1H), 5.96 (s, 1H), 5.05 (s, 1H), 4.06-3.92 (m, 4H), 2.67-2.62 (m, 4H), 1.90-1.84 (m, 4H), 1.44-1.41 (m, 4H). <sup>13</sup>C NMR (100 MHz, CDCl<sub>3</sub>) δ: 159.2, 146.9, 141.2, 139.9, 129.6, 128.4, 128.3, 127.7, 126.6, 126.1, 114.2, 113.3, 73.8, 32.3, 29.7, 25.9. IR (neat) 3371, 2923, 2853, 1738, 1588, 1462, 1376, 1160, 1113, 1033, 786. HRMS-ESI (m/z) [M + H]<sup>+</sup> calcd for C<sub>22</sub>H<sub>25</sub>O<sub>2</sub>: 321.1849; Found, 321.1845.

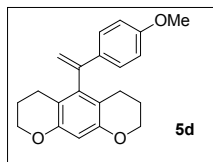

**5-(1-(4-methoxyphenyl)vinyl)-2,3,4,6,7,8-hexahydropyrano[3,2-g]chromene (5d):** solid; m.p. 121-123 °C; <sup>1</sup>H NMR (CDCl<sub>3</sub>, 400MHz) δ: 7.22 (d, *J* = 8.8 Hz, 2H), 6.82 (d, *J* = 8.8 Hz, 2H), 6.32 (s, 1H), 5.85 (d, *J* = 0.8 Hz, 1H), 5.00 (d, *J* = 8.8 Hz, 1H), 4.13-4.05 (m, 4H), 3.80 (s, 3H), 2.70-2.62 (m, 2H), 2.29-2.22 (m, 2H), 1.91-1.80 (m, 4H). <sup>13</sup>C NMR (100 MHz, CDCl<sub>3</sub>) δ: 159.3, 153.7, 144.7, 142.1, 131.2, 126.8, 113.8, 113.1, 112.4, 103.1, 66.2, 55.2, 22.7, 22.6. IR (neat) 3379, 2925, 2375, 1603, 1461, 1249, 1135, 1032, 839. HRMS-ESI (*m/z*) [*M* + *H*]<sup>+</sup> calcd for C<sub>21</sub>H<sub>23</sub>O<sub>3</sub>: 323.1642; Found, 323.1637.

## 6. General procedure for the preparation of the product 6aa

**1t** (0.2 mmol), **2a** (0.4 mmol), **6a** (0.6 mmol), Pd(OAc)<sub>2</sub> (4.5 mg, 10 mol %), PPh<sub>3</sub> (10.5 mg, 20 mol %), norbornene (37.6 mg, 0.4 mmol, 2 equiv), Cs<sub>2</sub>CO<sub>3</sub> (326 mg, 1 mmol, 5 equiv), H<sub>2</sub>O (5equiv) were dissolved in 4 mL of degassed dry dioxane. The mixture was flushed with N<sub>2</sub> and stirred at room temperature for 15 minutes, then heated at 80 °C for 16 h. After cooling at room temperature, the mixture was diluted with diethyl ether, washed with water, dried over magnesium sulfate, and purified by flash chromatography (silica, petroleum ether/AcOEt).

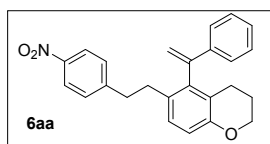

**6-(4-nitrophenethyl)-5-(1-phenylvinyl)chroman (6aa):** oil; <sup>1</sup>H NMR (CDCl<sub>3</sub>, 400MHz) δ: 8.04 (d, *J* = 8.4 Hz, 2H), 7.29-7.26 (m, 5H), 7.10 (d, *J* = 8.4 Hz, 2H), 6.99 (d, *J* = 8.4 Hz, 1H), 6.78 (d, *J* = 8.4 Hz, 1H), 6.01 (d, *J* = 0.8 Hz, 1H), 5.06 (d, *J* = 0.8 Hz, 1H), 4.17-4.08 (m, 2H), 2.86-2.68 (m, 5H), 2.38-2.30 (m, 1H), 1.94-1.88 (m, 2H). <sup>13</sup>C NMR (100 MHz, CDCl<sub>3</sub>) δ: 153.4, 150.0, 146.2, 145.6, 141.1, 139.1, 132.3, 130.3, 129.2, 128.6, 128.4, 128.0, 127.6, 125.8, 123.5, 120.8, 116.0, 114.8, 66.0, 38.0, 34.5, 23.3, 22.4. IR (neat) 3404, 3079, 2929, 2862, 1598, 1517, 1345, 1192, 1106, 954, 909, 735. HRMS-ESI (*m/z*) [*M* + *H*]<sup>+</sup> calcd for C<sub>25</sub>H<sub>24</sub>O<sub>3</sub>N: 386.1751; Found, 386.1743.

## 7. References:

- (1) Fulton, J. R.; Aggarwal, V. K.; de Vicente, J. Eur. J. Org. Chem. 2005, 1479.
- (2) (a) Mariampillai, B.; Alberico, D.; Bidau, V.; Lautens, M.; J. Am. Chem. Soc. 2006, 128, 14436. (b) Pache, S.; Lautens, M. Org. Lett. 2003, 5, 4827.

## 8. Crystallographic data of 3o

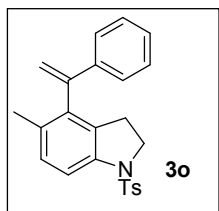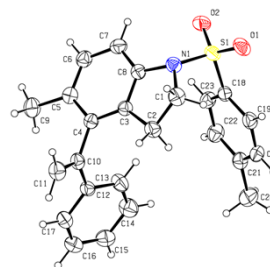

Structure of 3o

### Datablock:

|                    |                                                    |                                                    |
|--------------------|----------------------------------------------------|----------------------------------------------------|
| Bond precision:    | C-C = 0.0038 A                                     | Wavelength=0.71073                                 |
| Cell:              | a=11.9663(6)    b=8.2591(4)    c=20.6407(10)       |                                                    |
|                    | alpha=90    beta=96.402(5)    gamma=90             |                                                    |
| Temperature:       | 293 K                                              |                                                    |
|                    | Calculated                                         | Reported                                           |
| Volume             | 2027.22(17)                                        | 2027.24(17)                                        |
| Space group        | P 21/c                                             | P 1 21/c 1                                         |
| Hall group         | -P 2ybc                                            | -P 2ybc                                            |
| Moiety formula     | C <sub>24</sub> H <sub>23</sub> N O <sub>2</sub> S | C <sub>24</sub> H <sub>23</sub> N O <sub>2</sub> S |
| Sum formula        | C <sub>24</sub> H <sub>23</sub> N O <sub>2</sub> S | C <sub>24</sub> H <sub>23</sub> N O <sub>2</sub> S |
| Mr                 | 389.50                                             | 389.49                                             |
| Dx,g cm-3          | 1.276                                              | 1.276                                              |
| Z                  | 4                                                  | 4                                                  |
| Mu (mm-1)          | 0.179                                              | 0.179                                              |
| F000               | 824.0                                              | 824.0                                              |
| F000'              | 824.82                                             |                                                    |
| h,k,lmax           | 14,10,25                                           | 14,10,25                                           |
| Nref               | 3992                                               | 3987                                               |
| Tmin,Tmax          | 0.950,0.960                                        | 0.543,1.000                                        |
| Tmin'              | 0.919                                              |                                                    |
| Correction method= | MULTI-SCAN                                         |                                                    |
| Data completeness= | 0.999                                              | Theta(max)= 26.022                                 |
| R(reflections)=    | 0.0552( 2557)                                      | wR2(reflections)= 0.1445( 3987)                    |
| S =                | 1.061                                              | Npar= 264                                          |

9. <sup>1</sup>H NMR, <sup>13</sup>C NMR Spectra for products 3a-3x, 5a-5d and 6aa

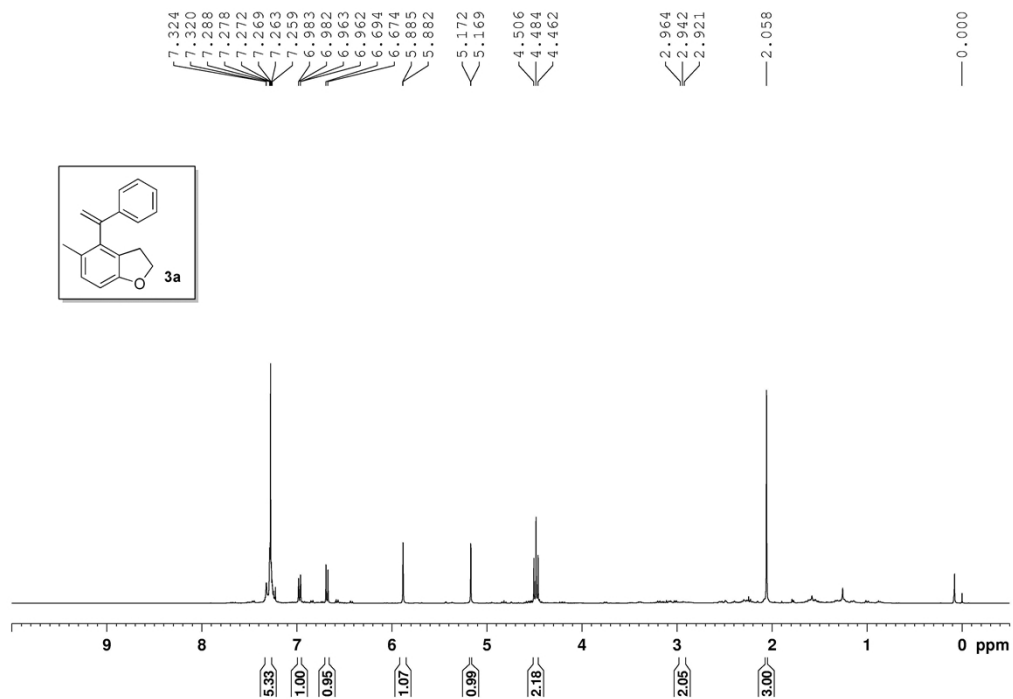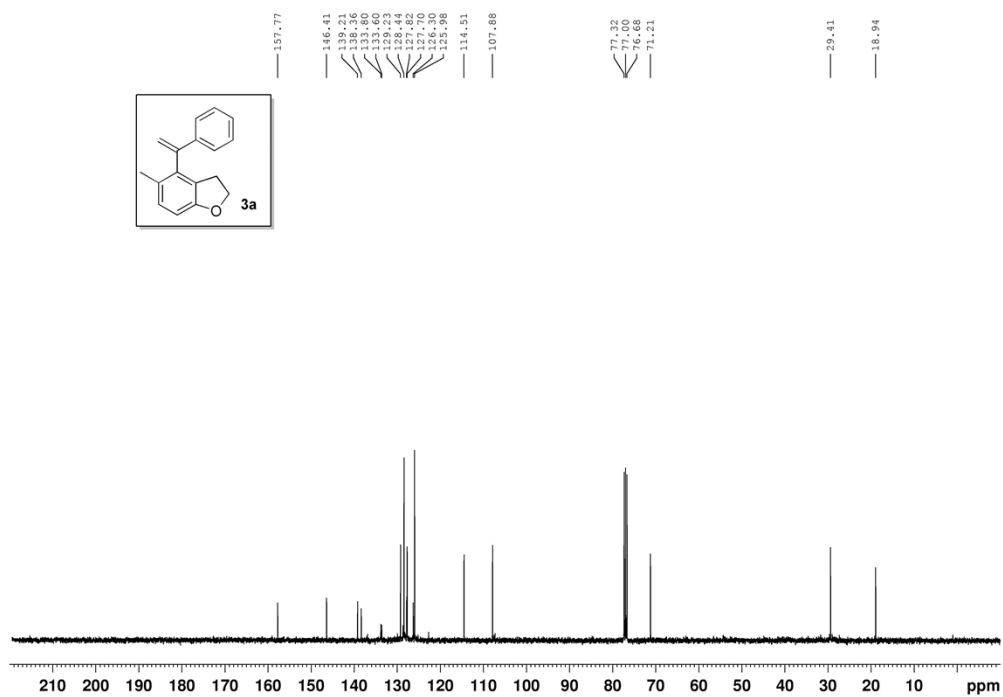



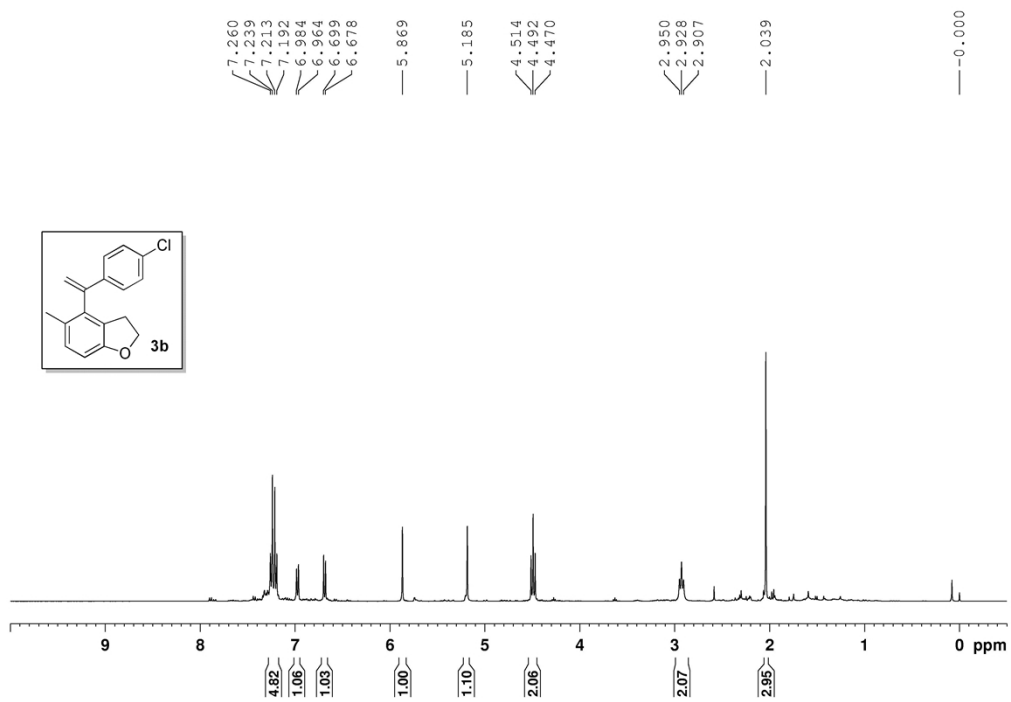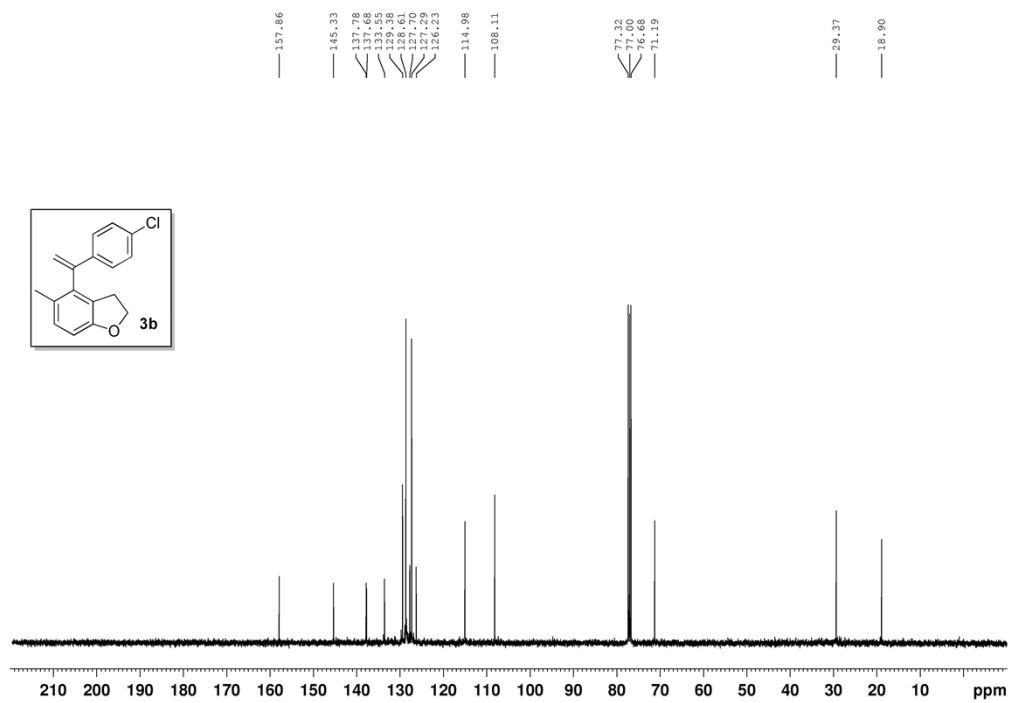

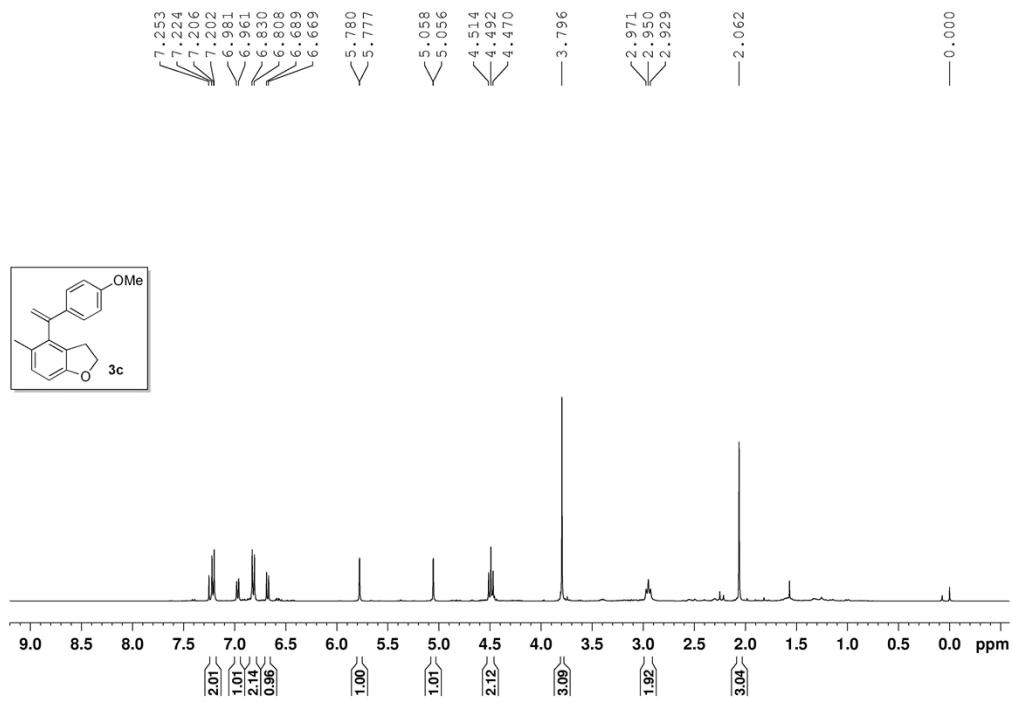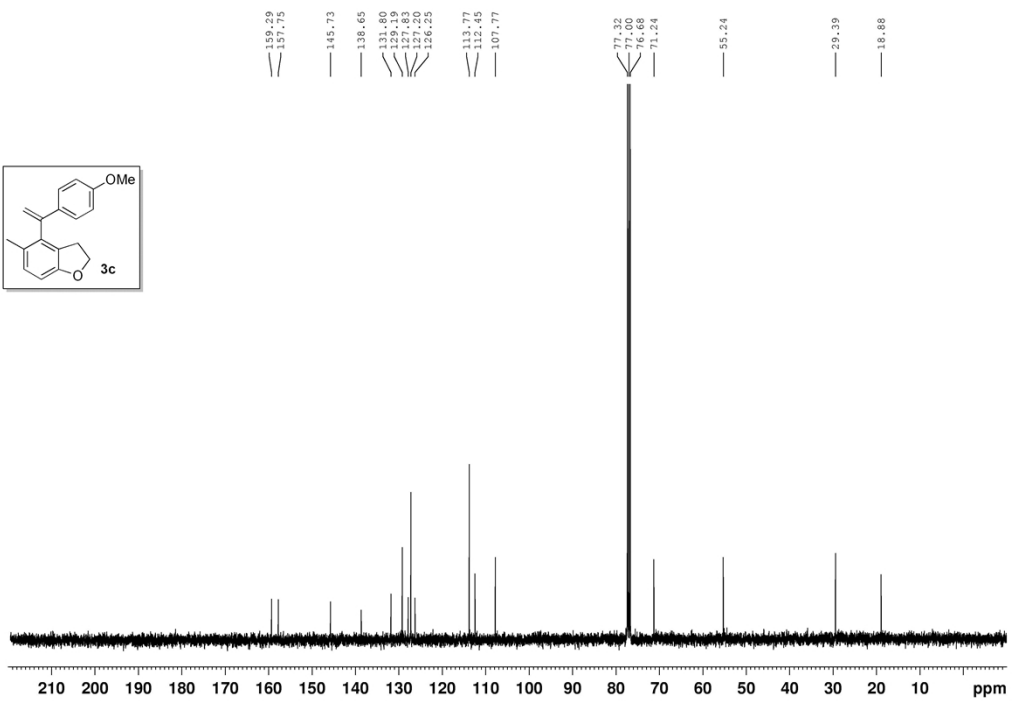

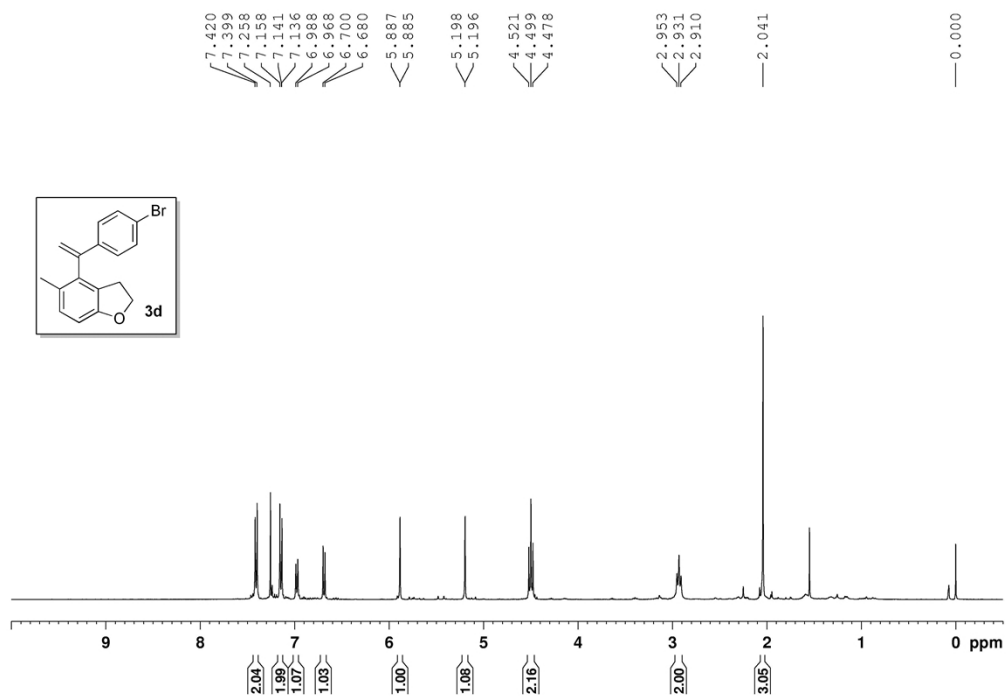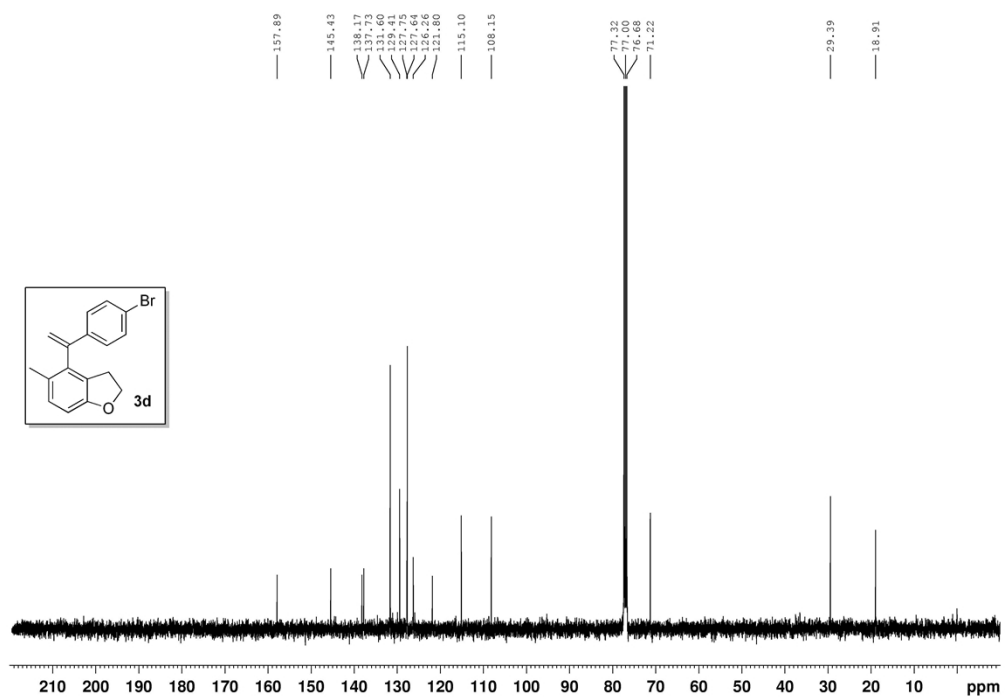

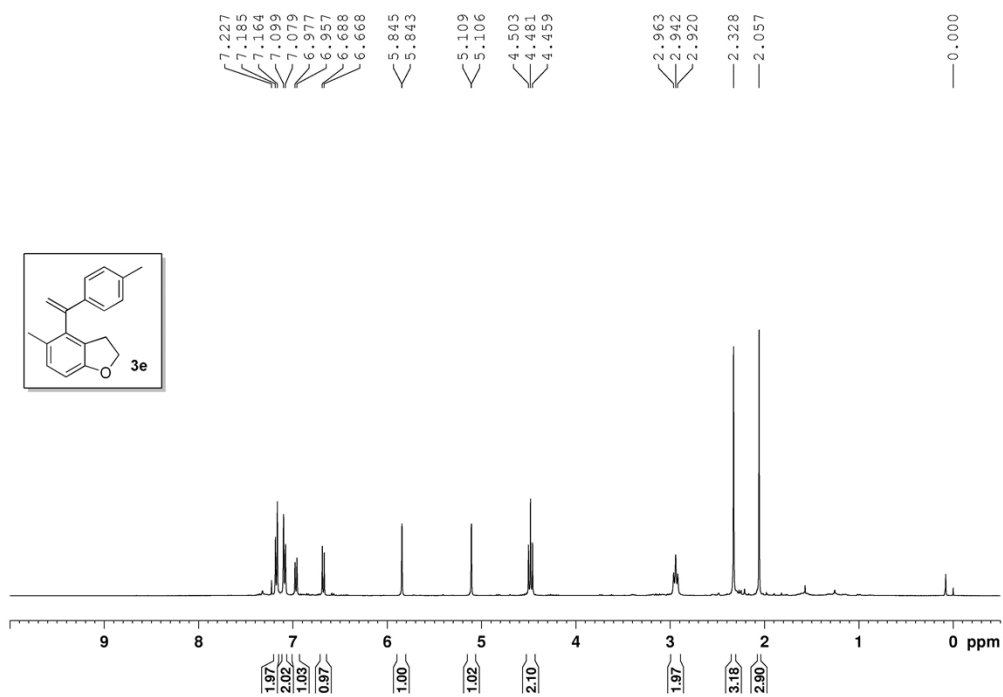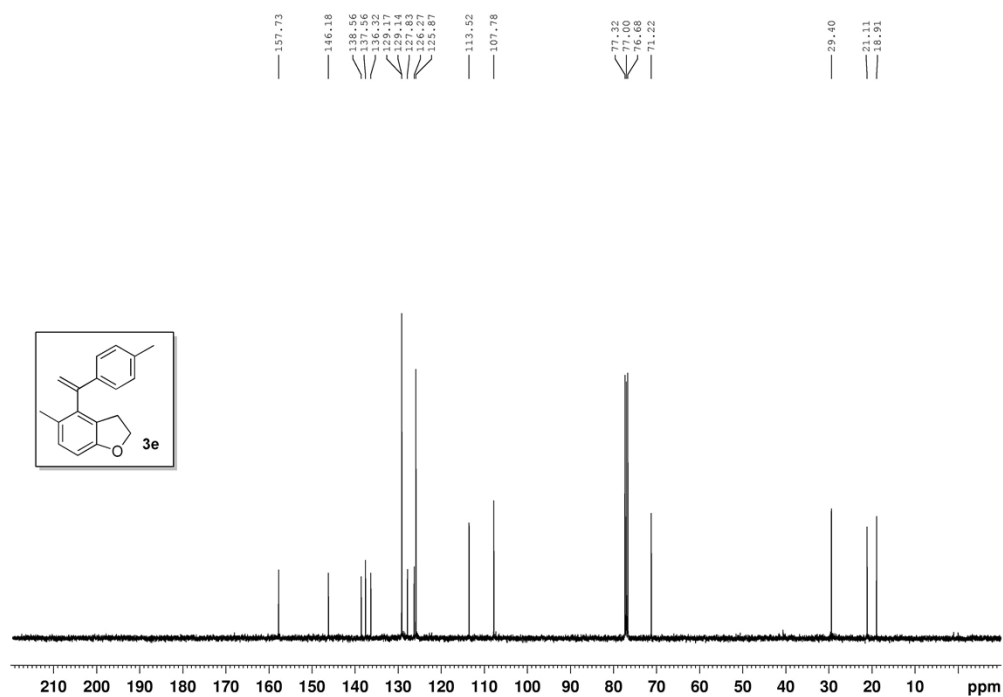

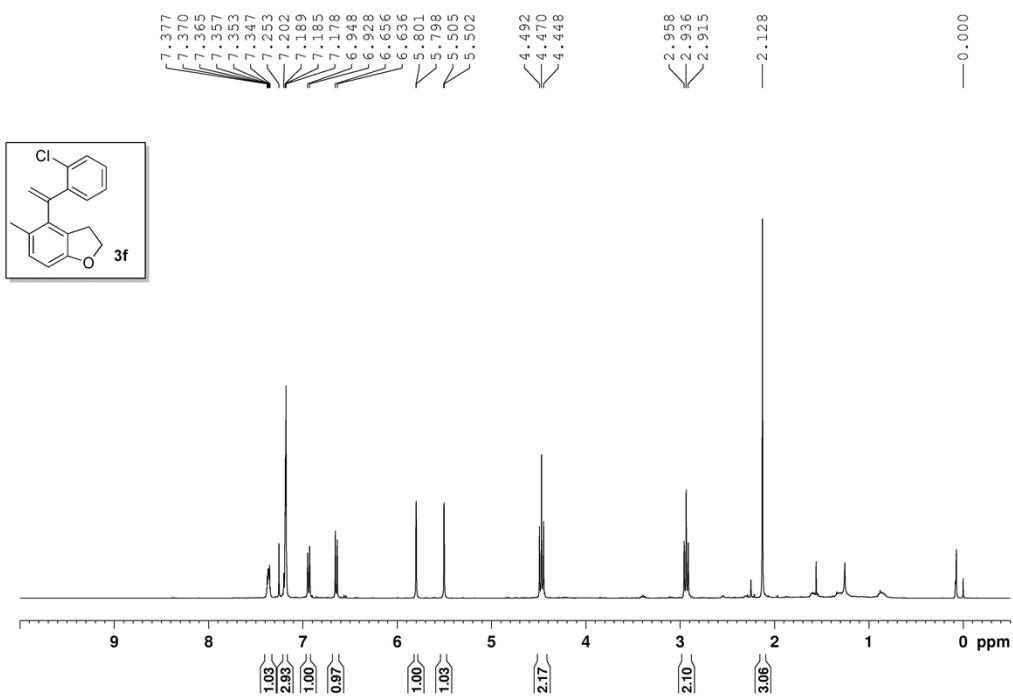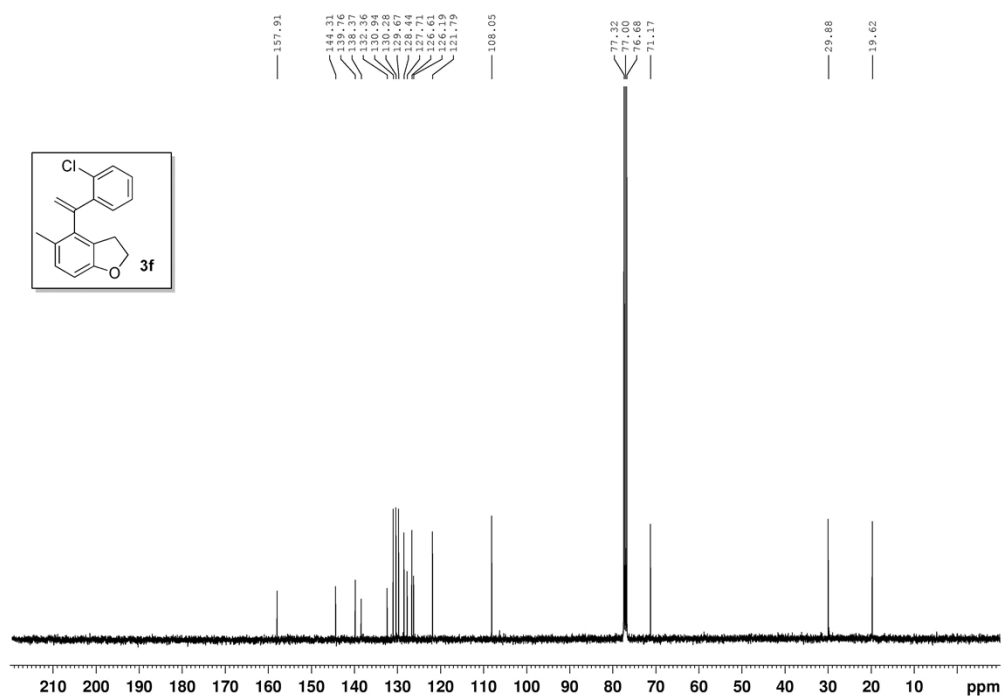

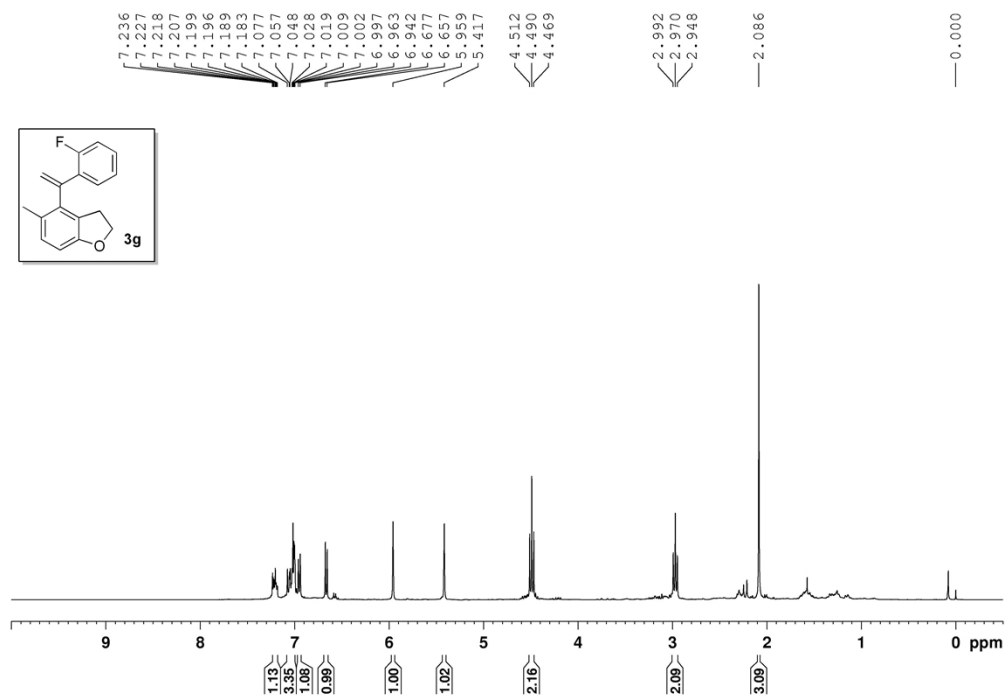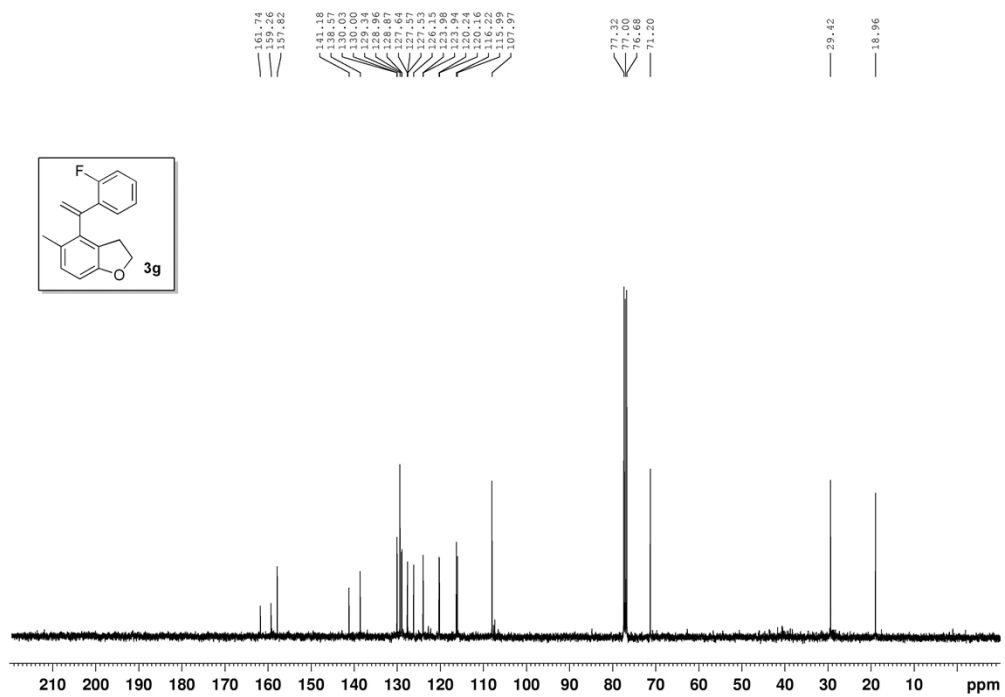

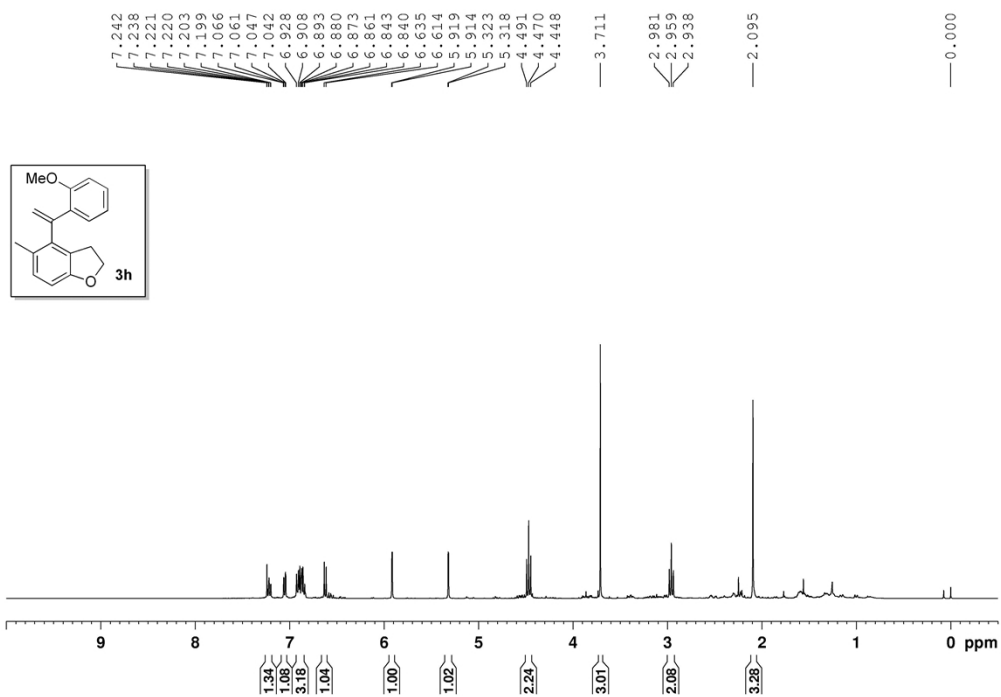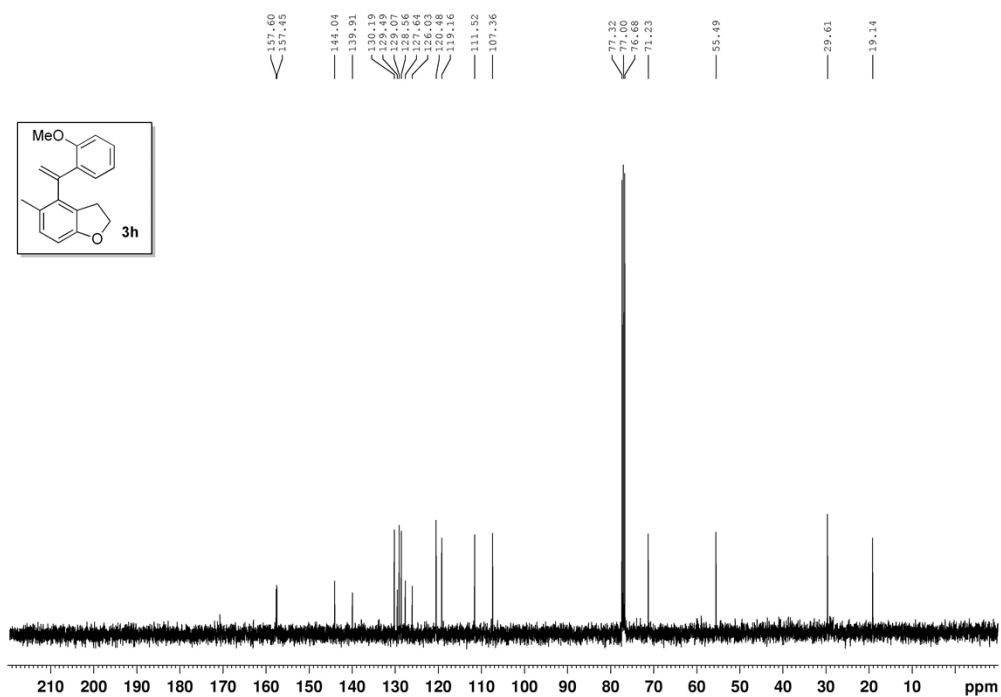

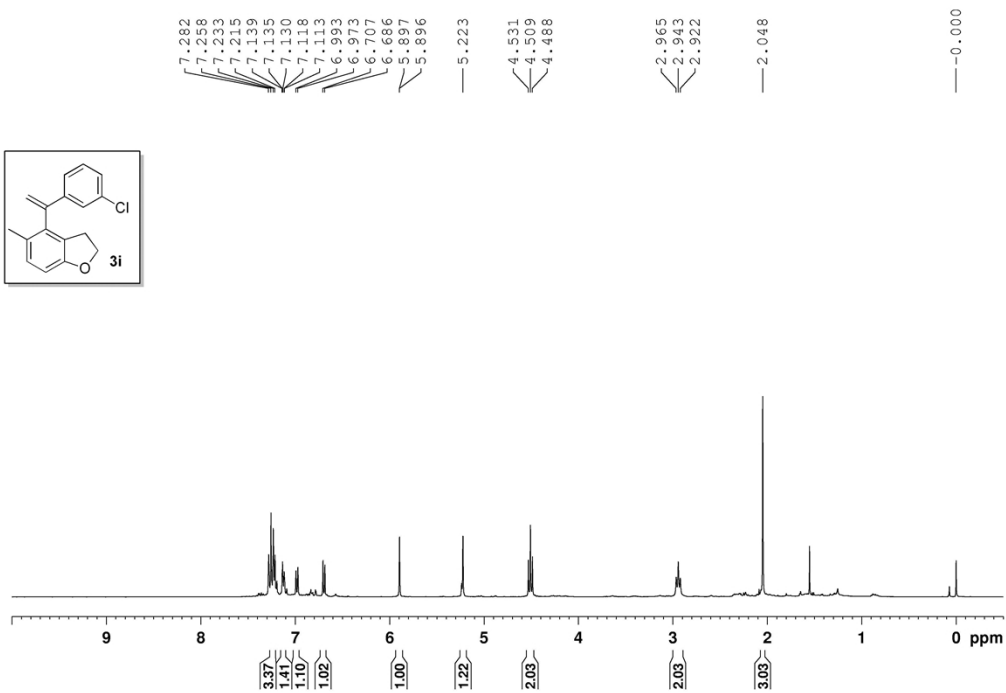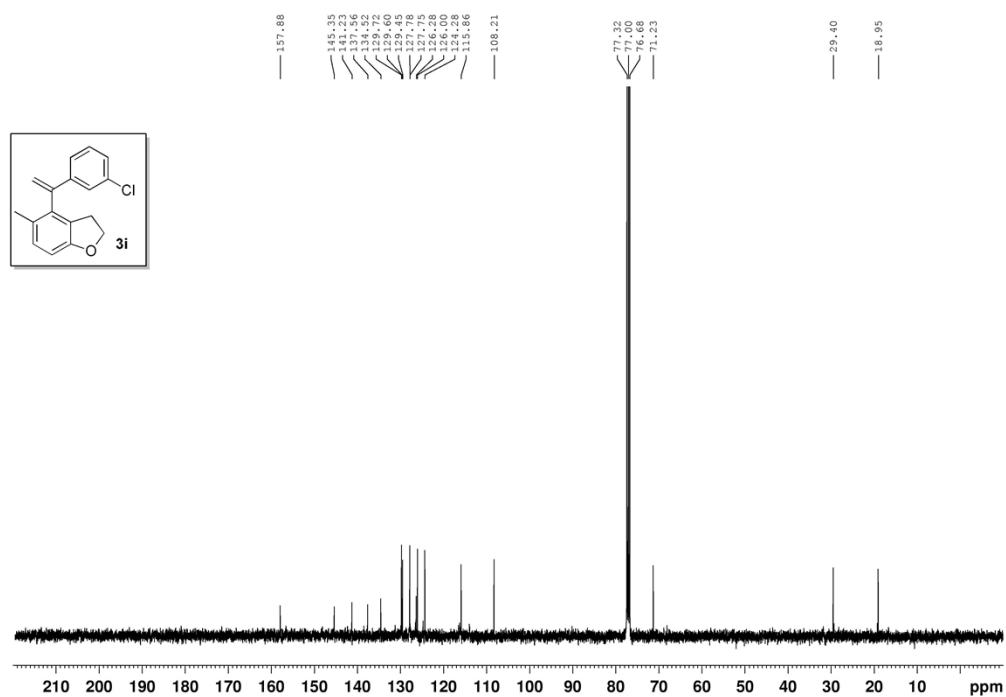



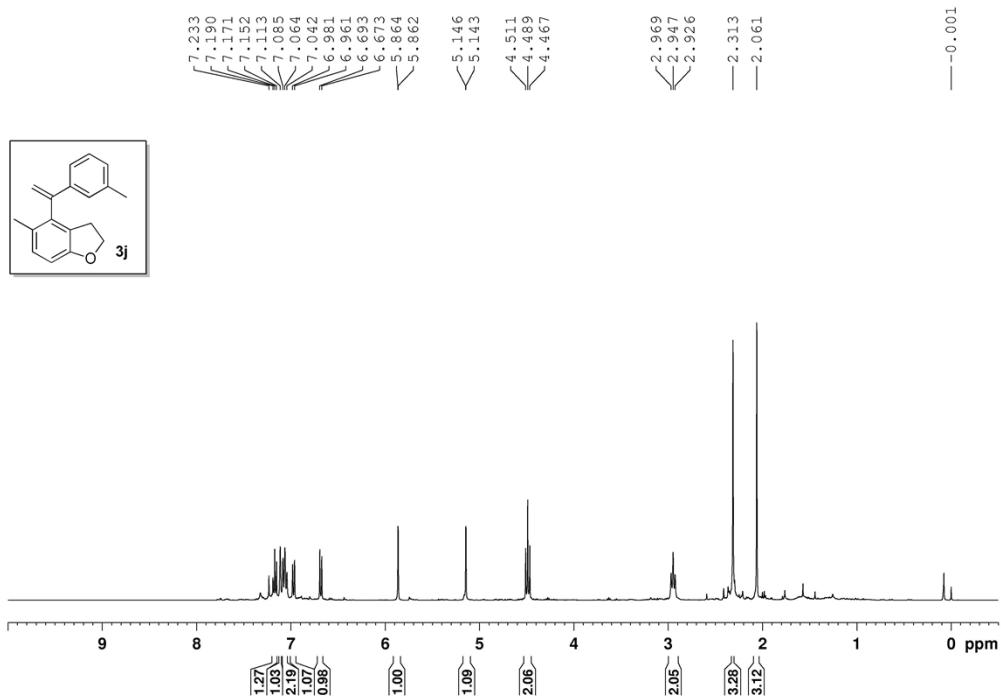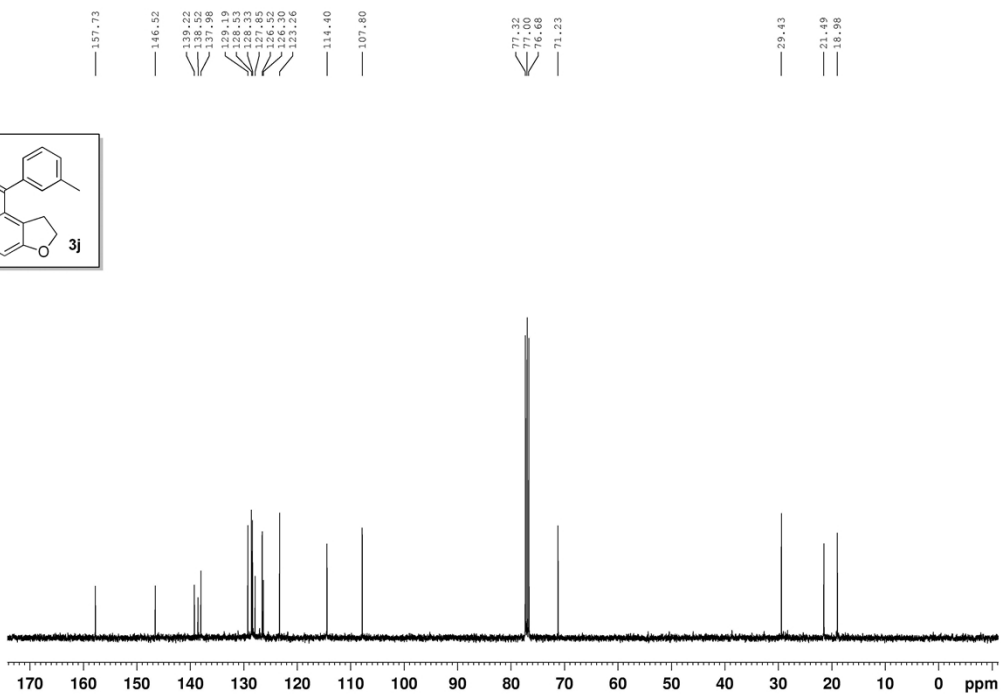

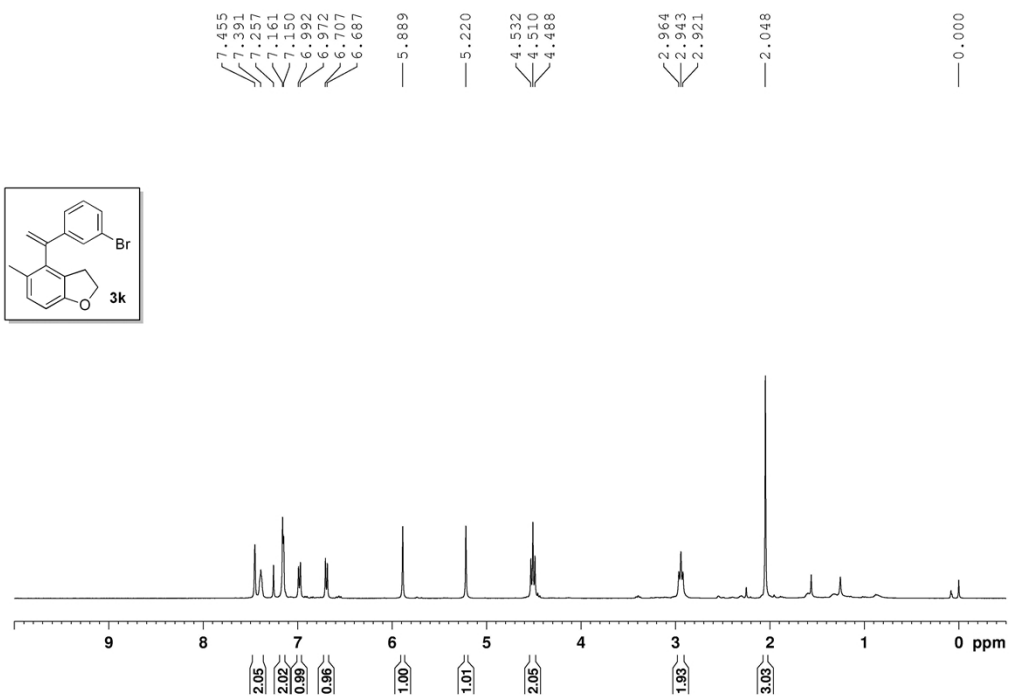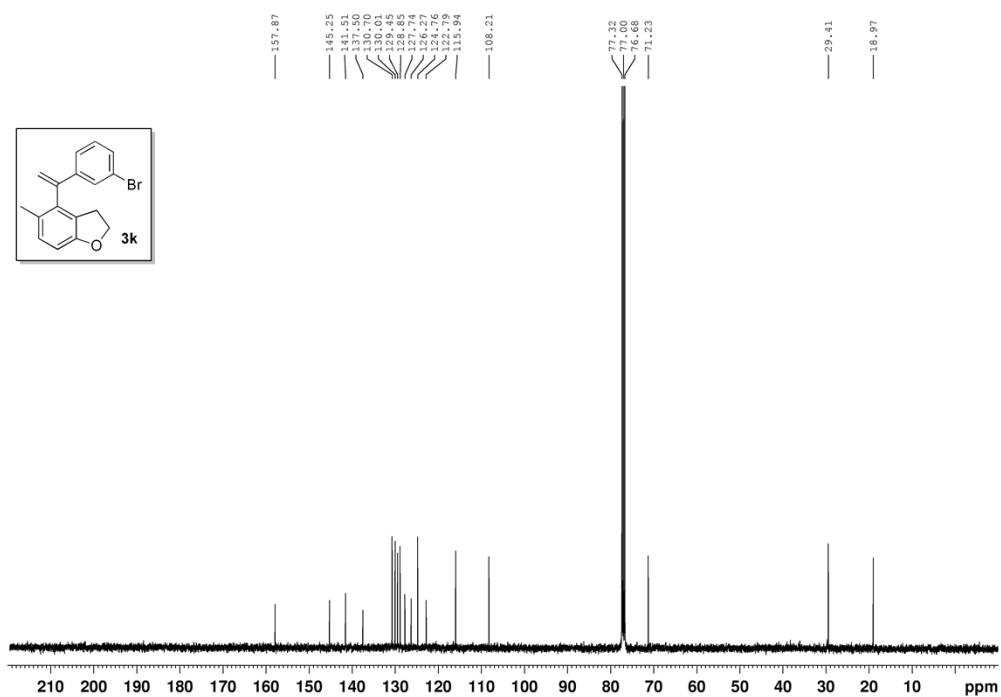

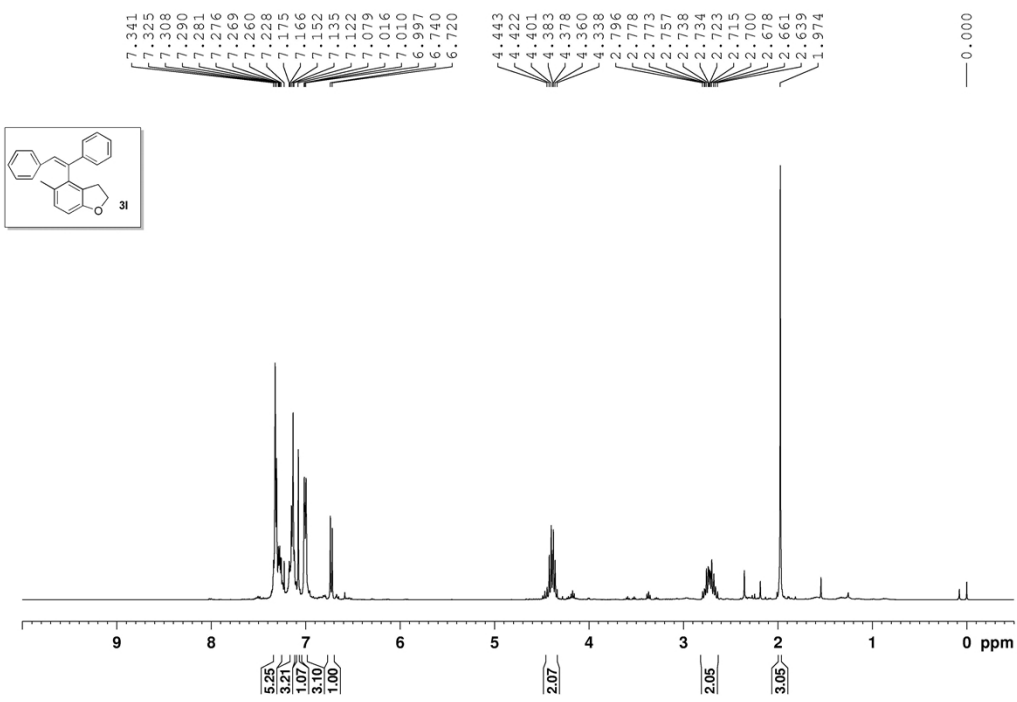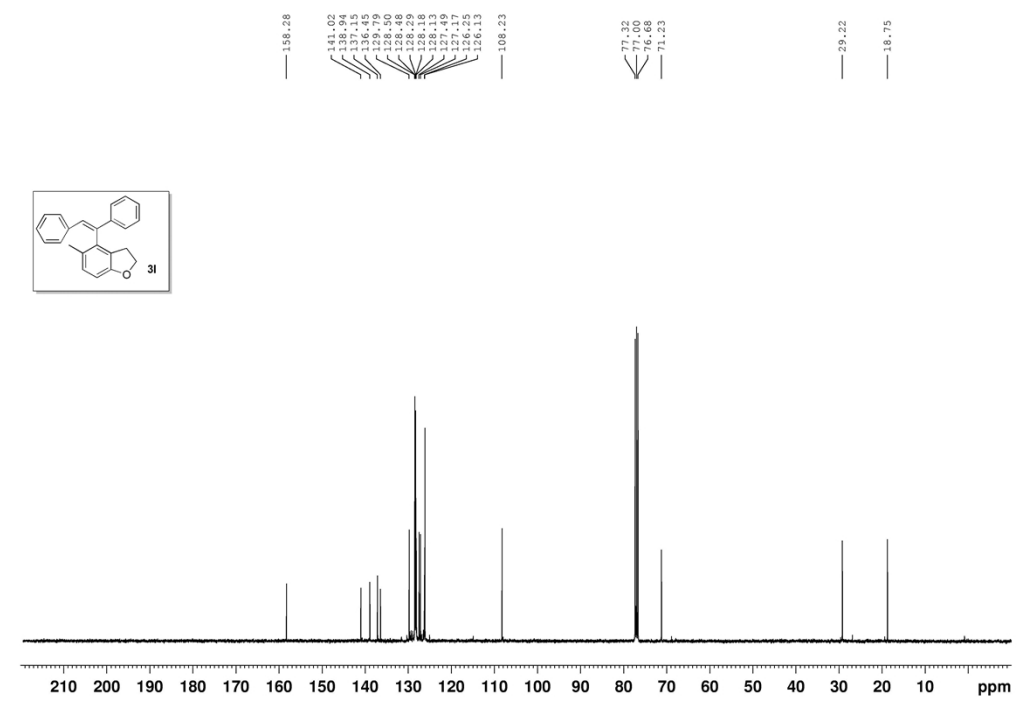

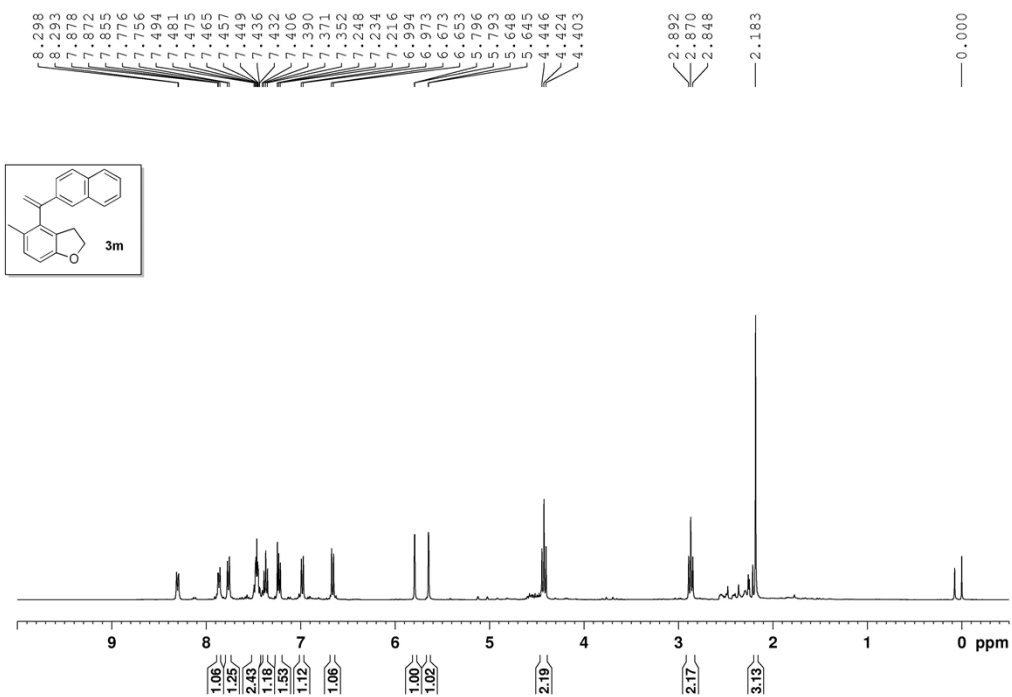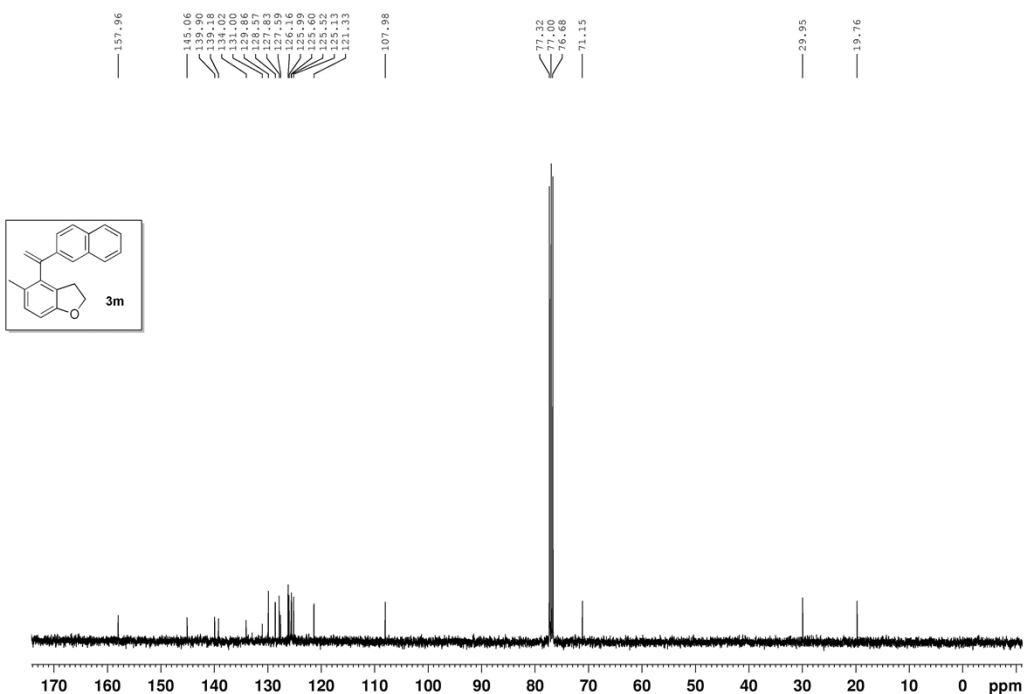

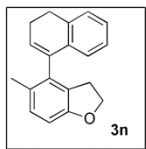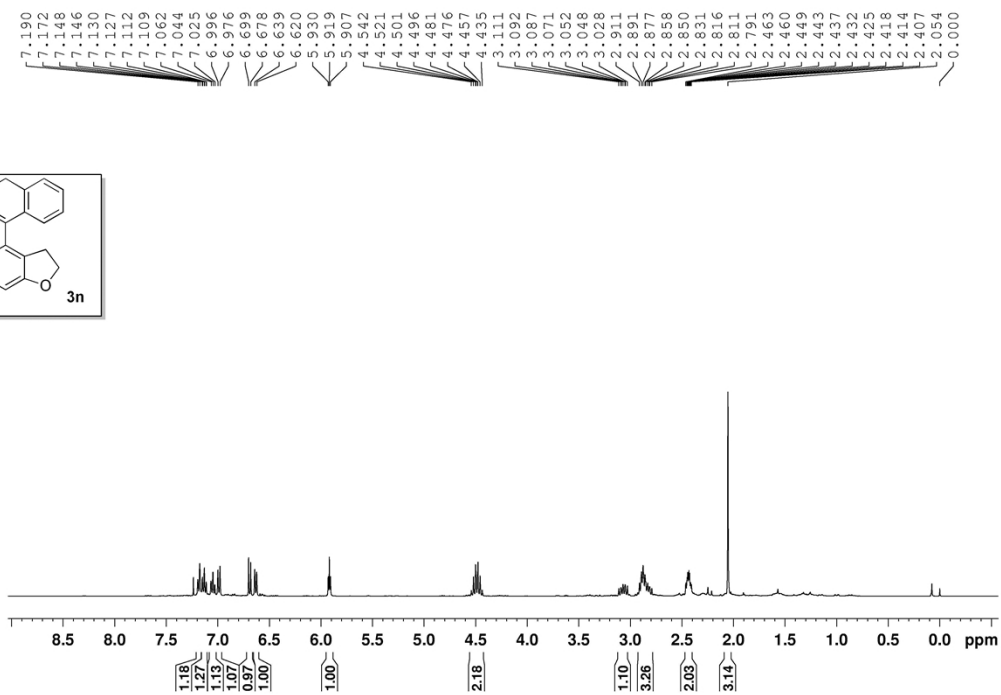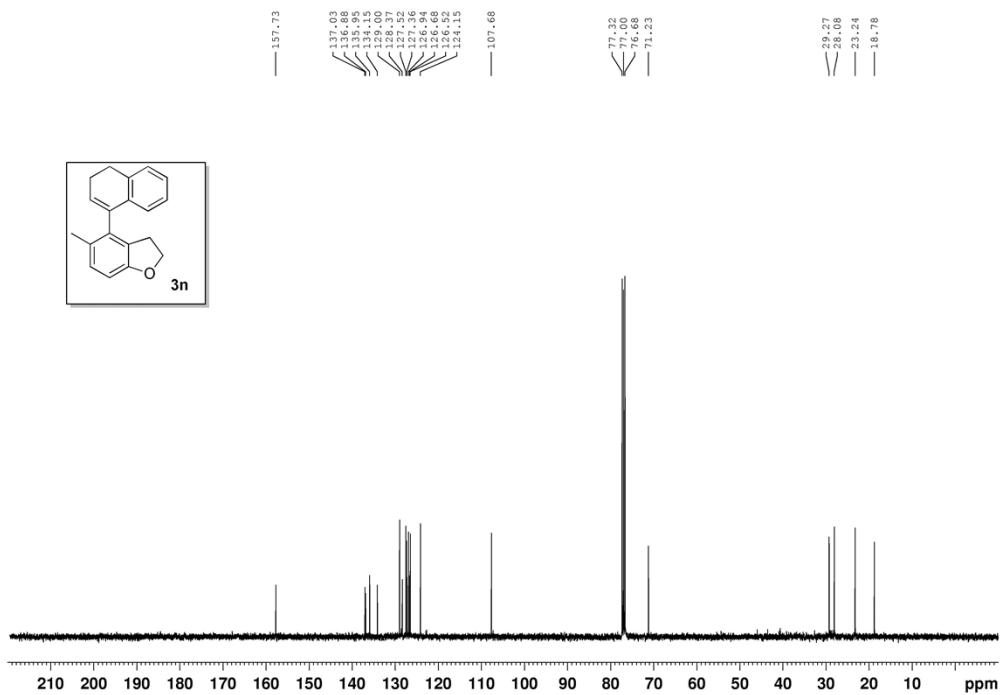

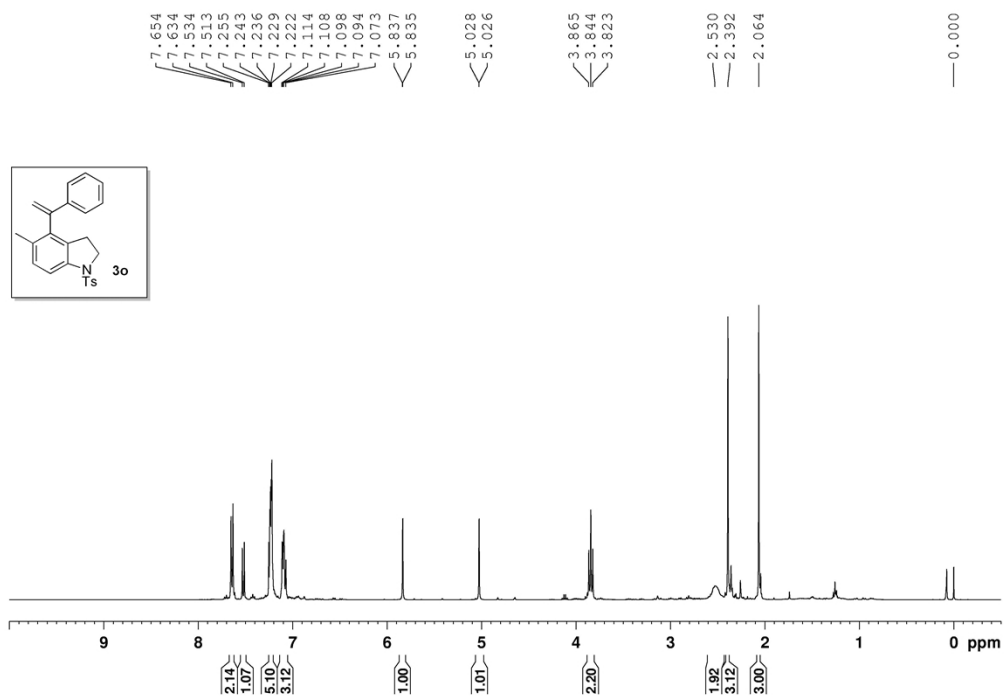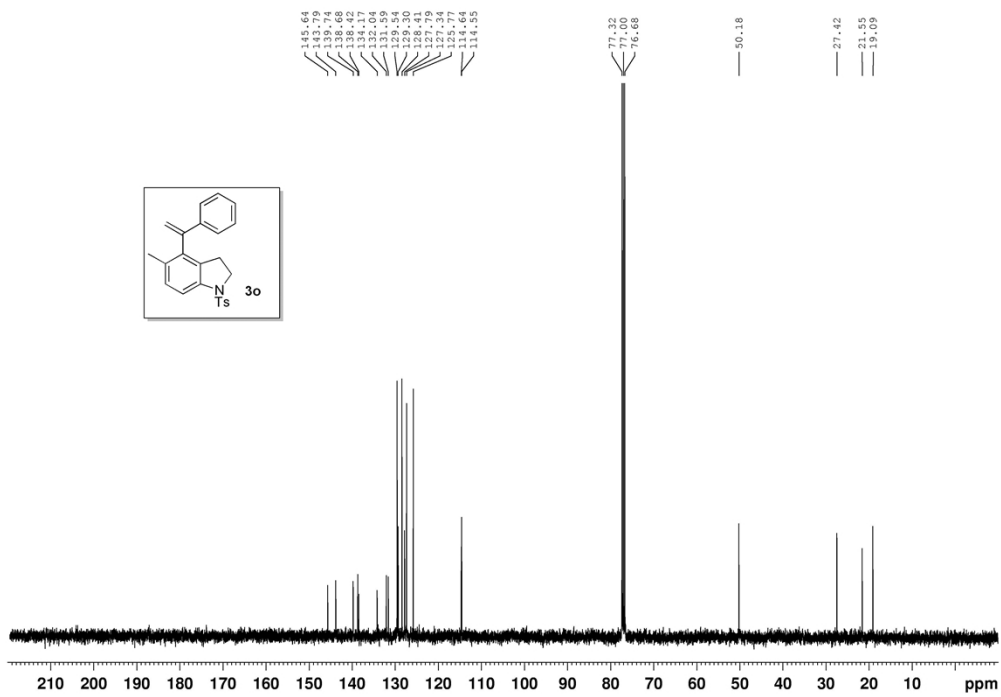

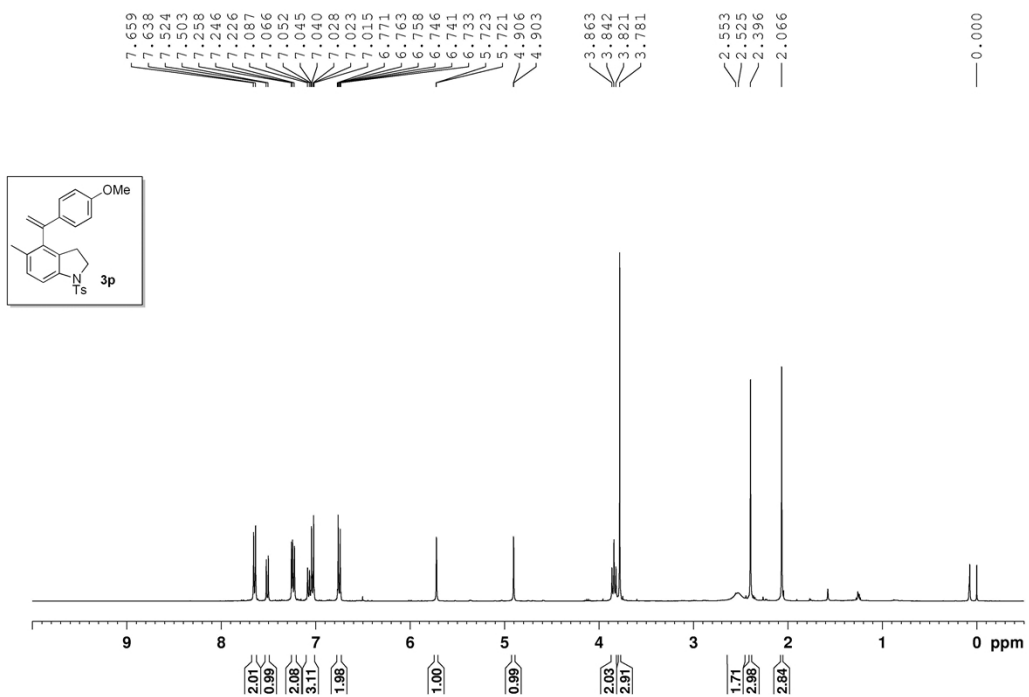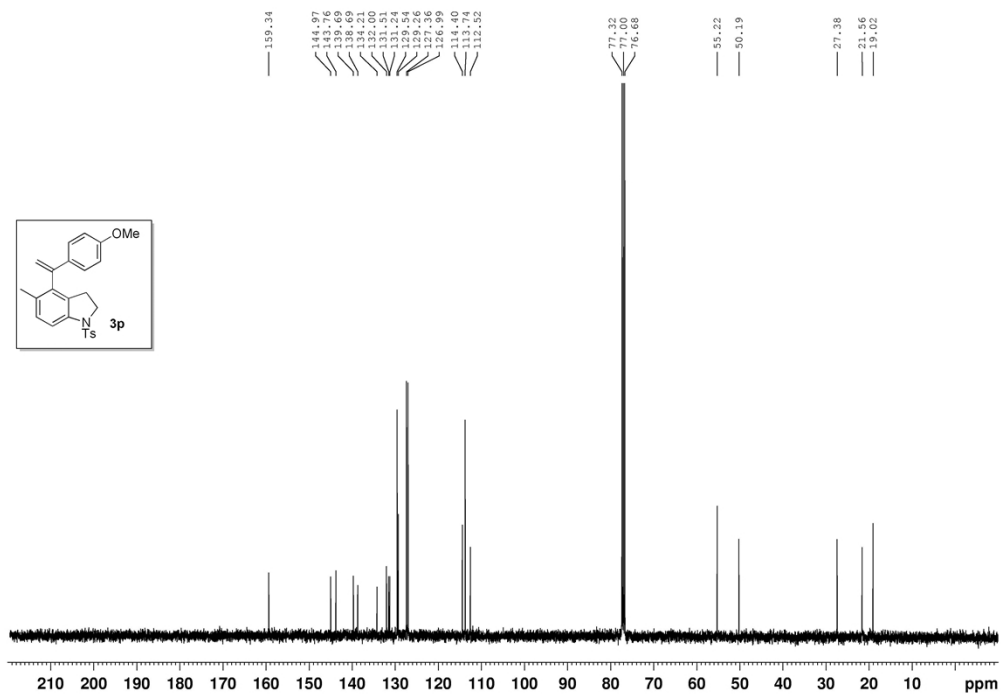

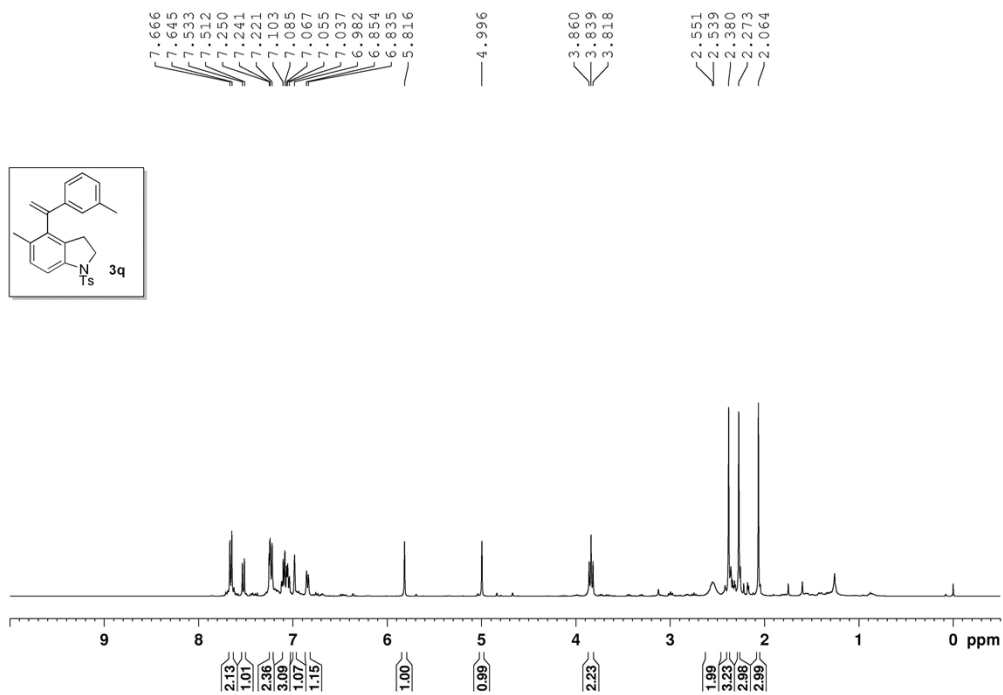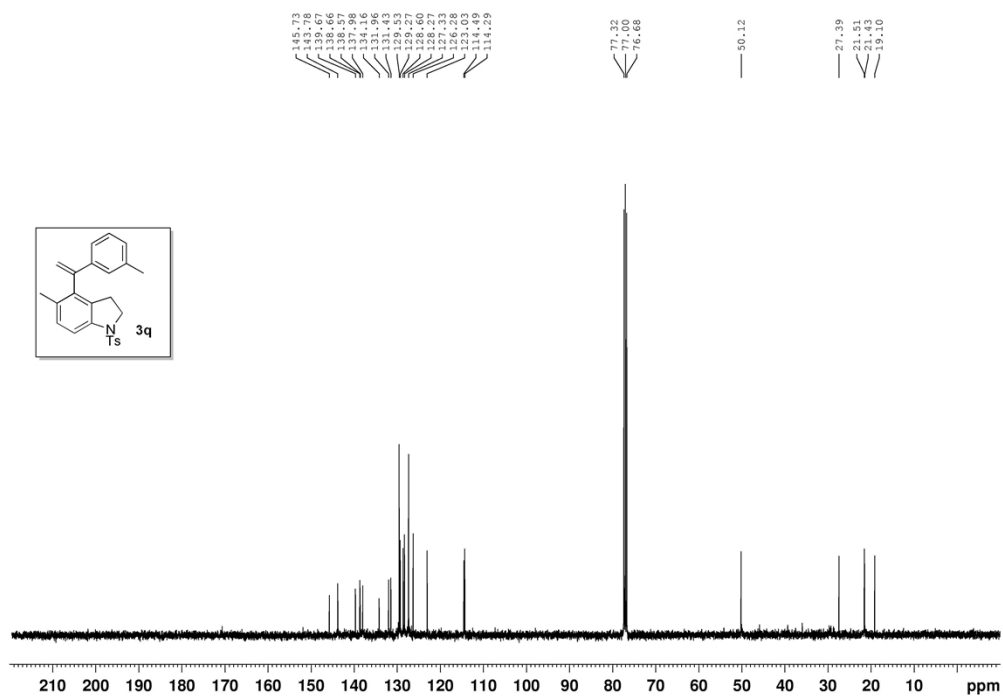



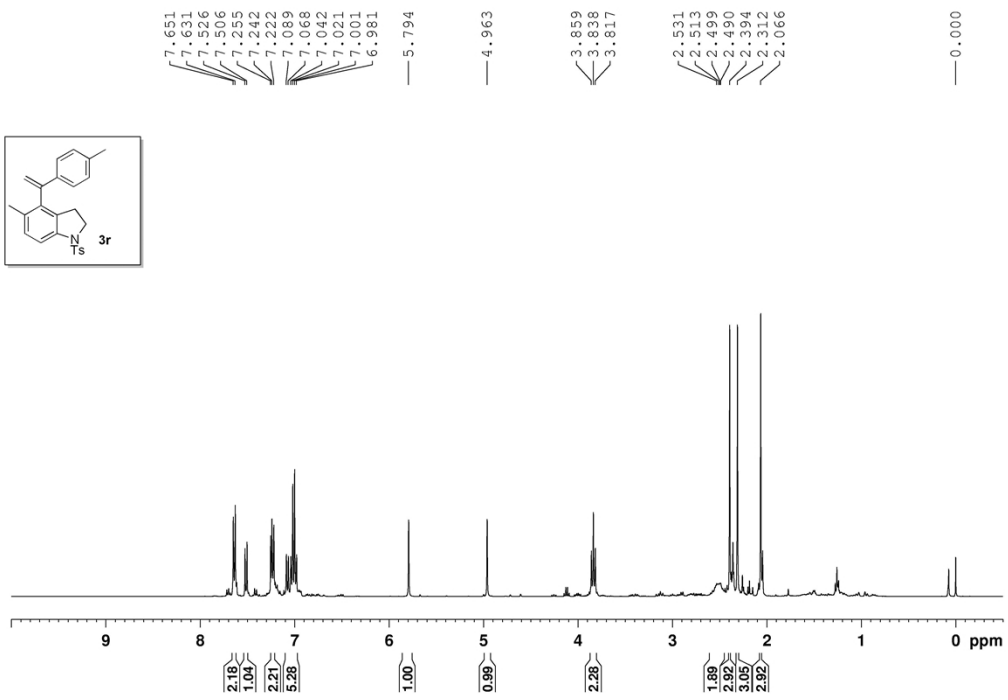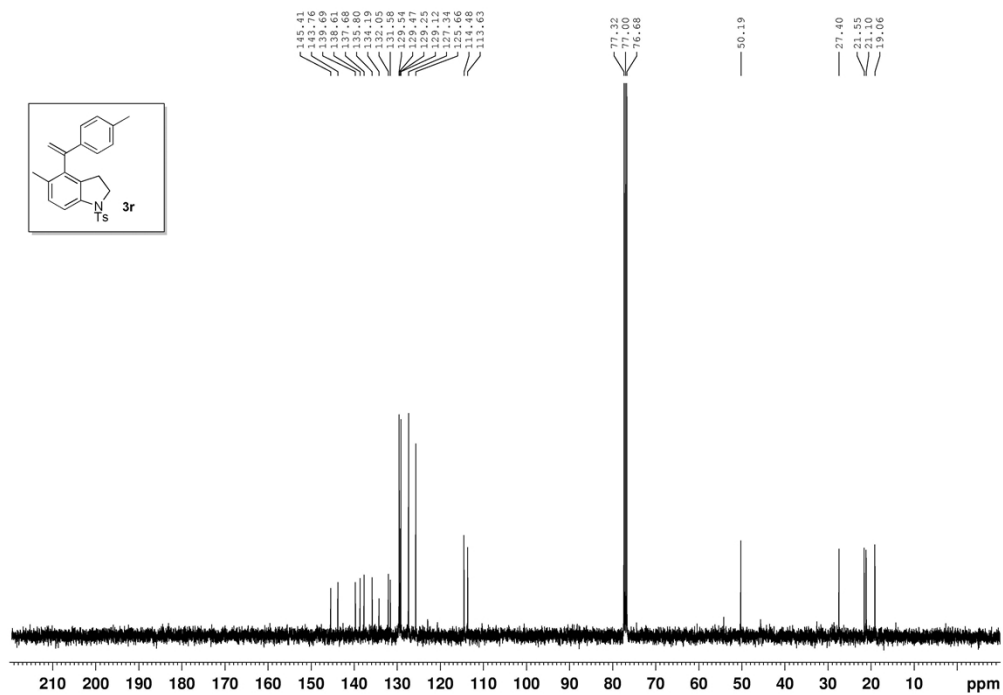

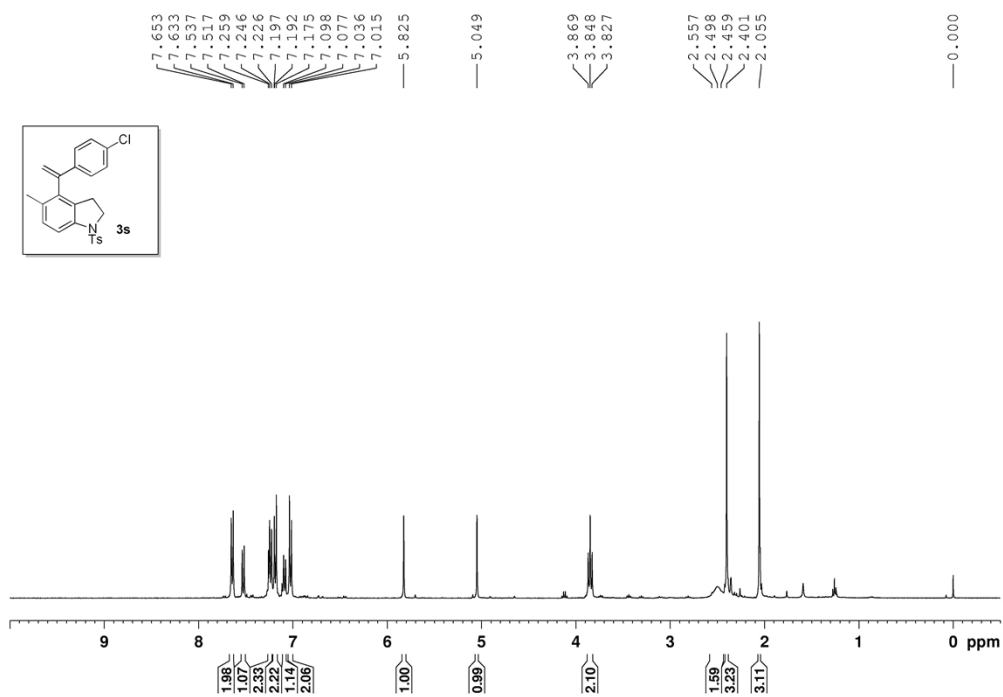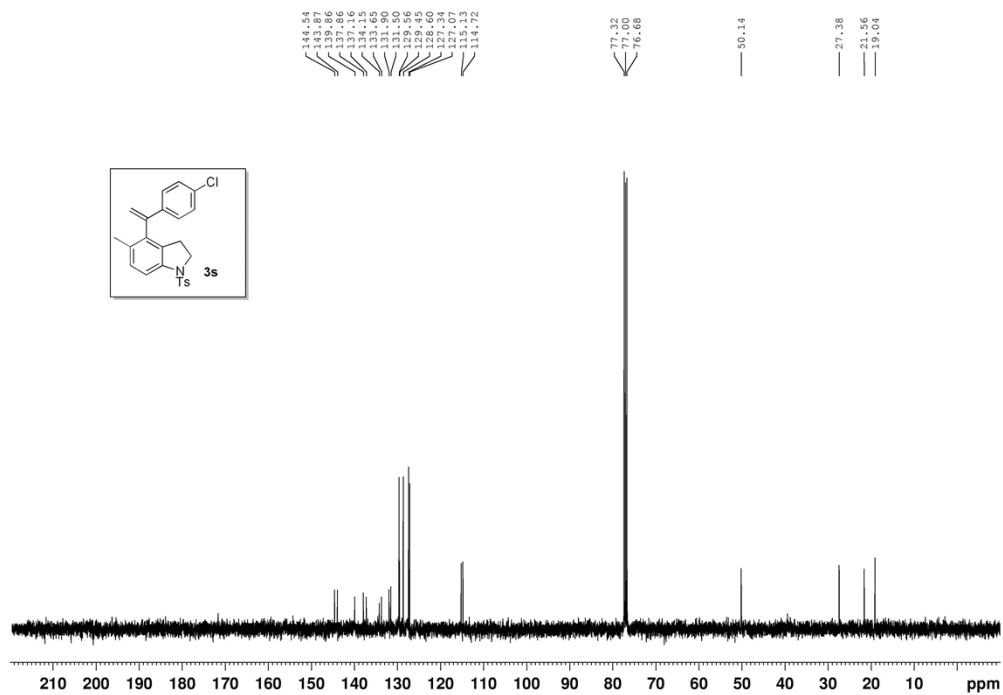

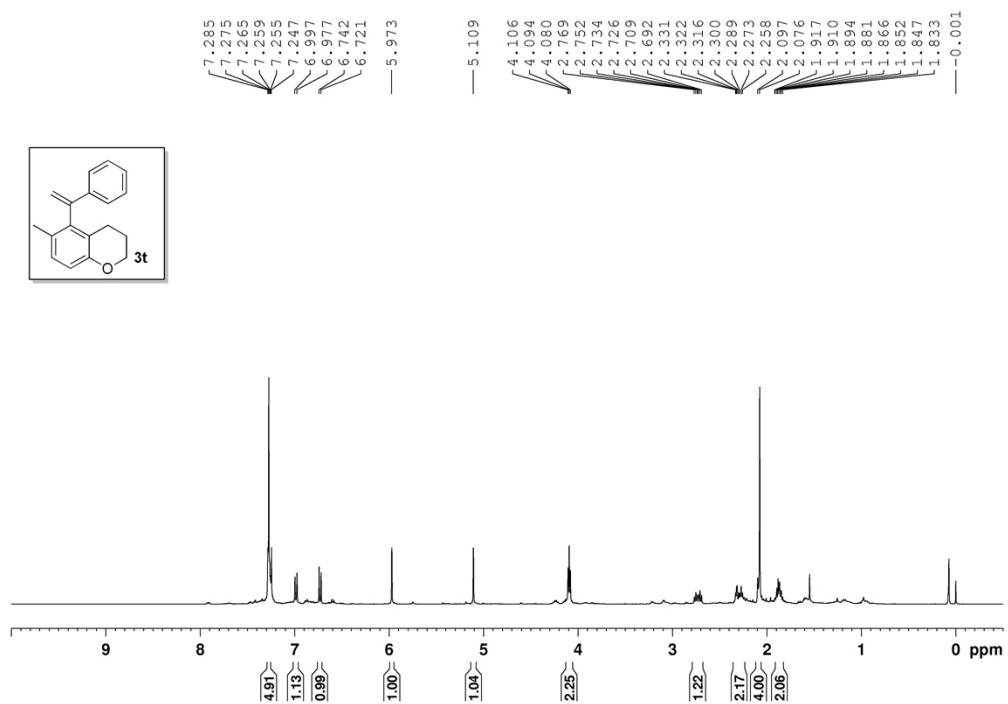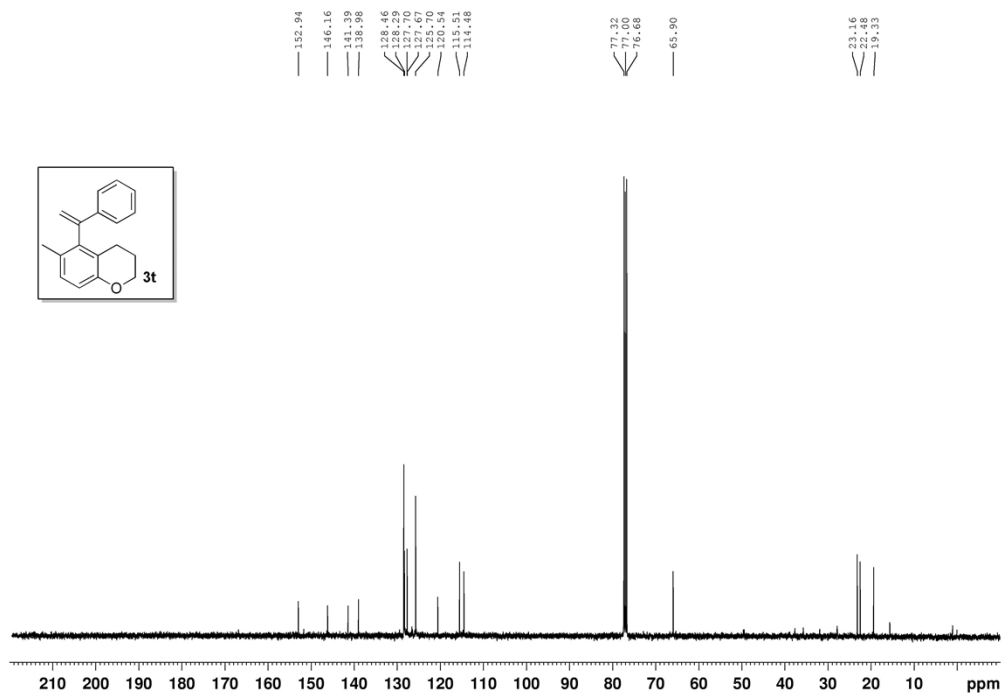

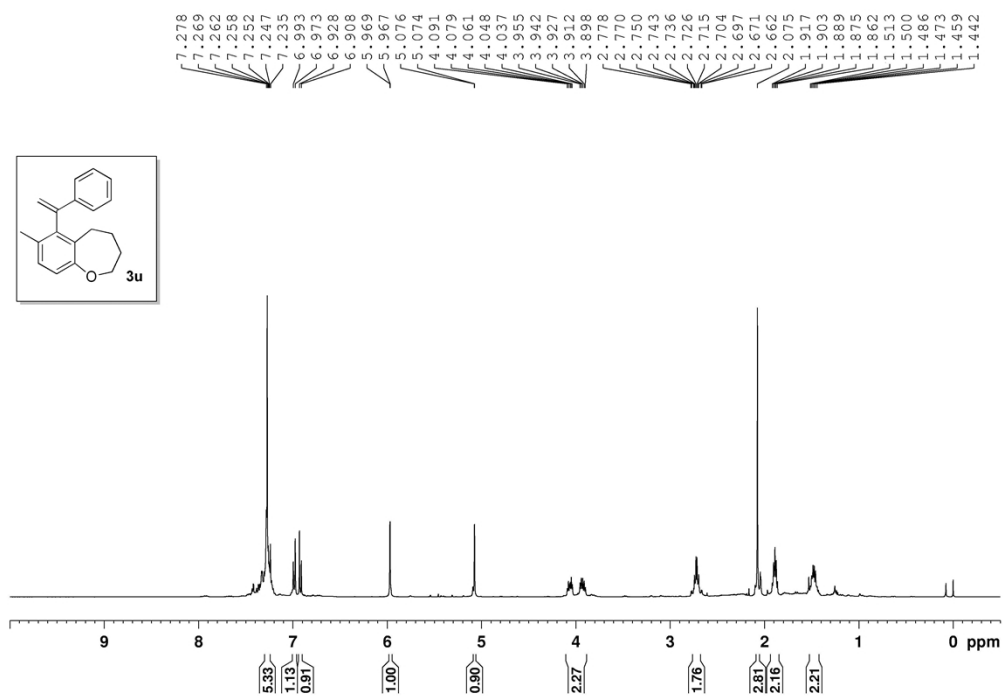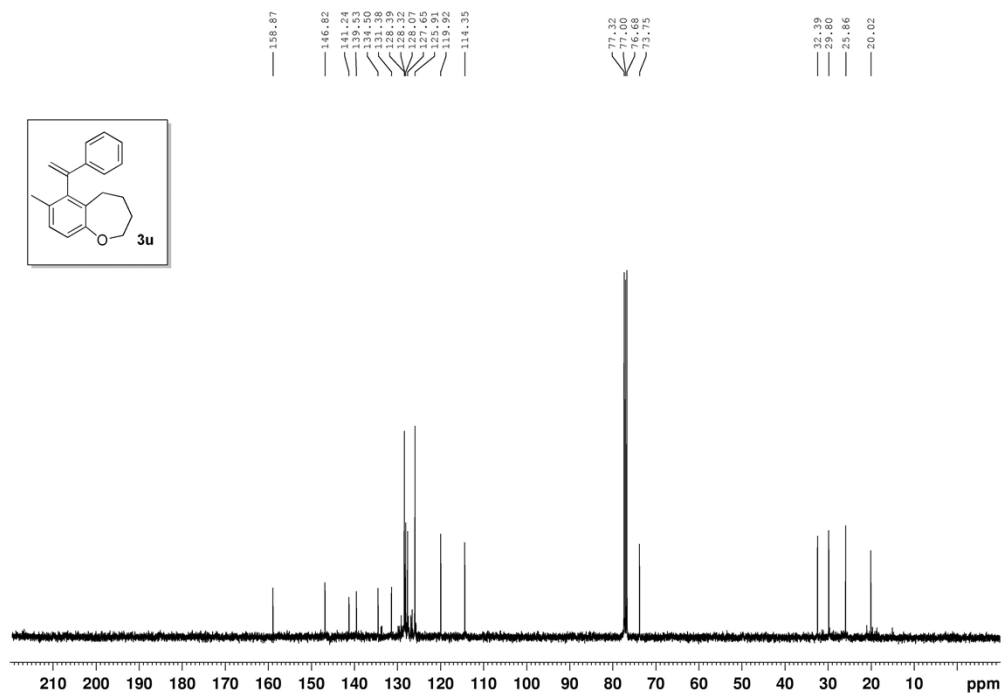

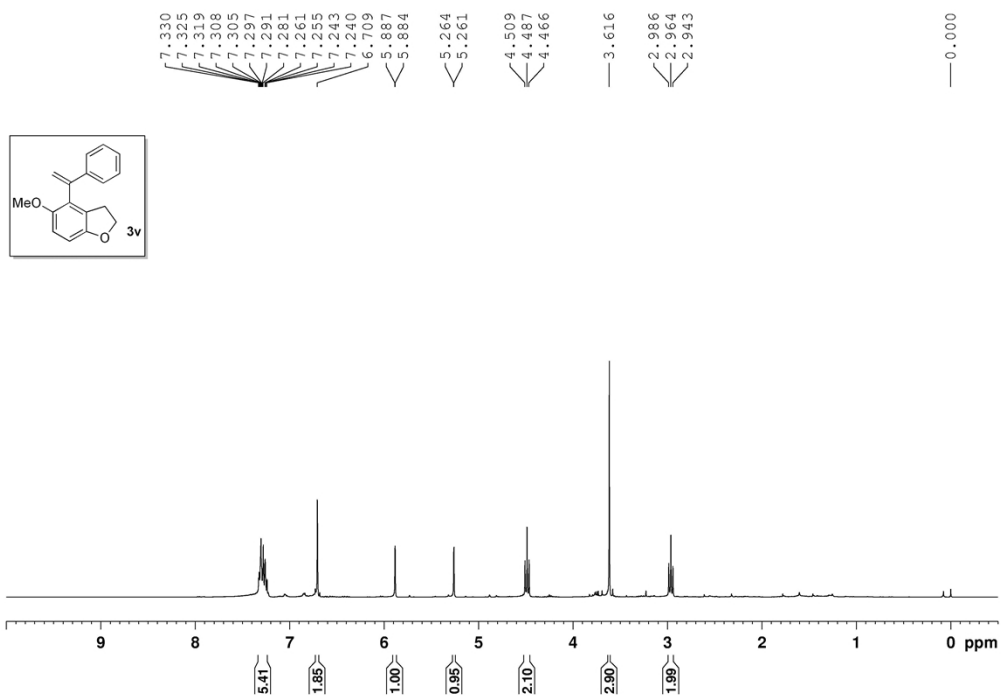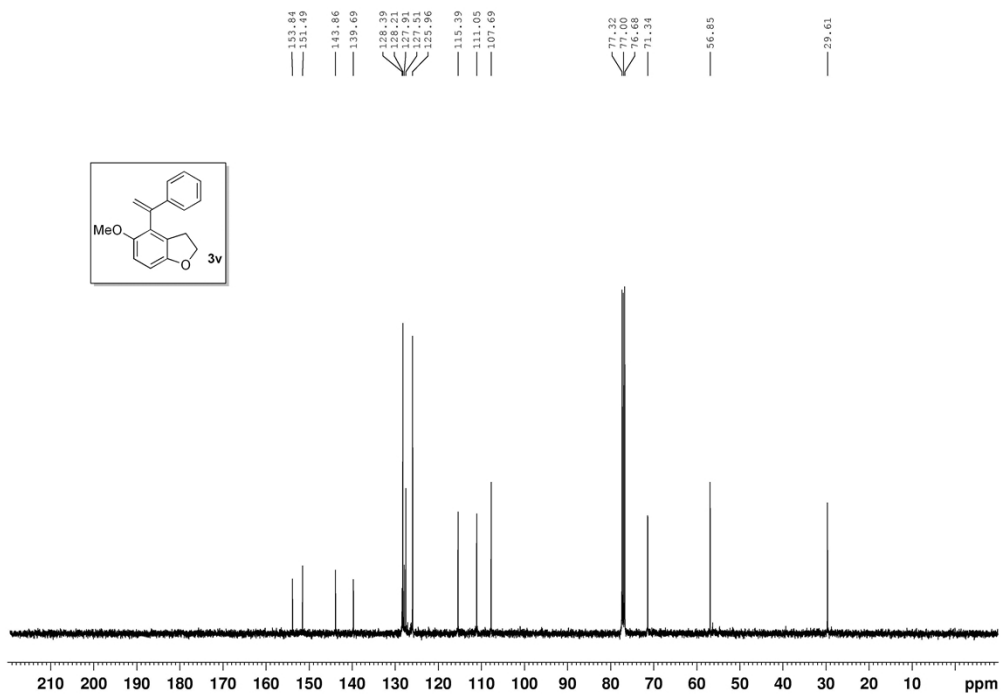

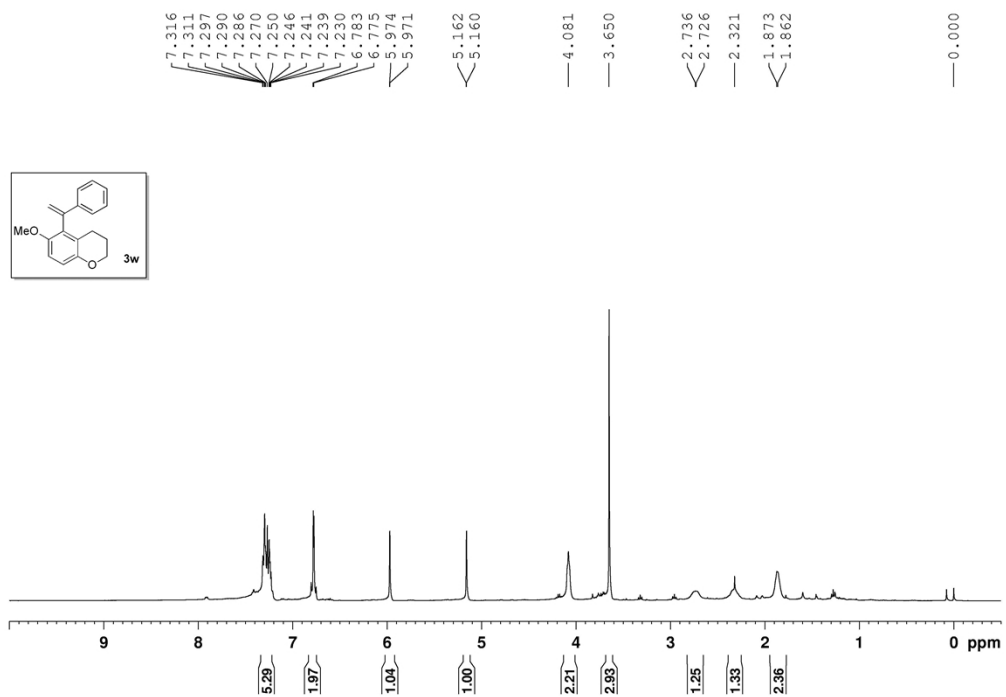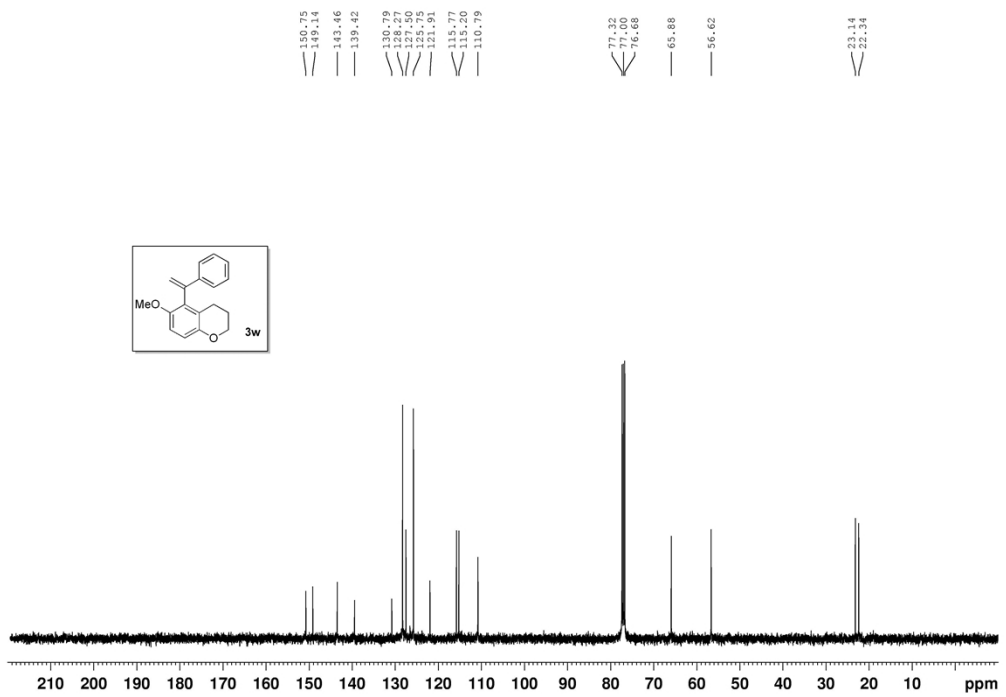

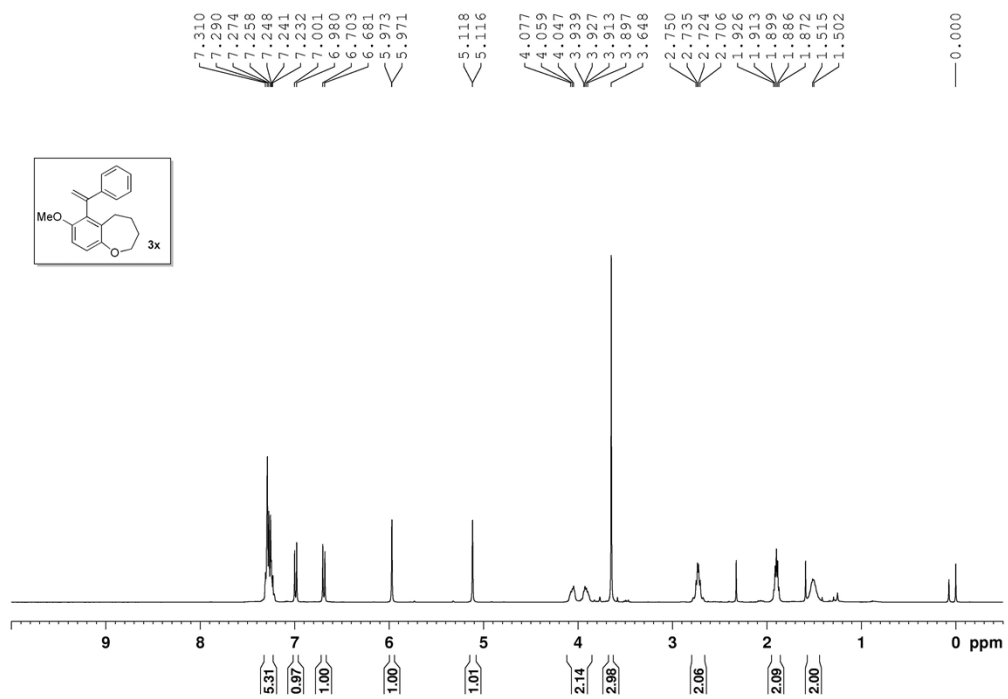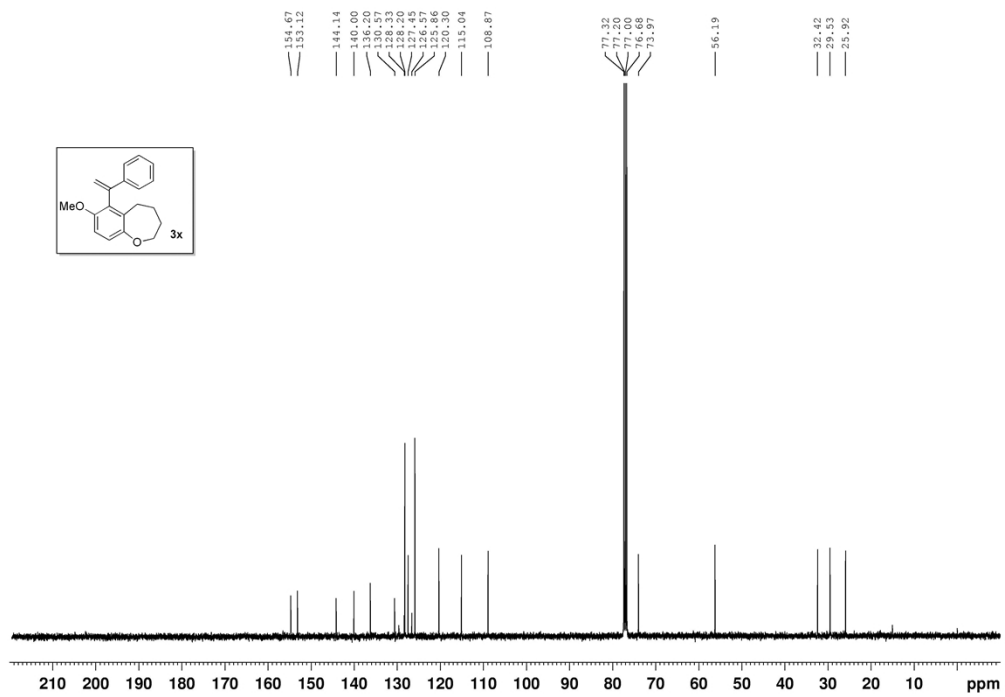

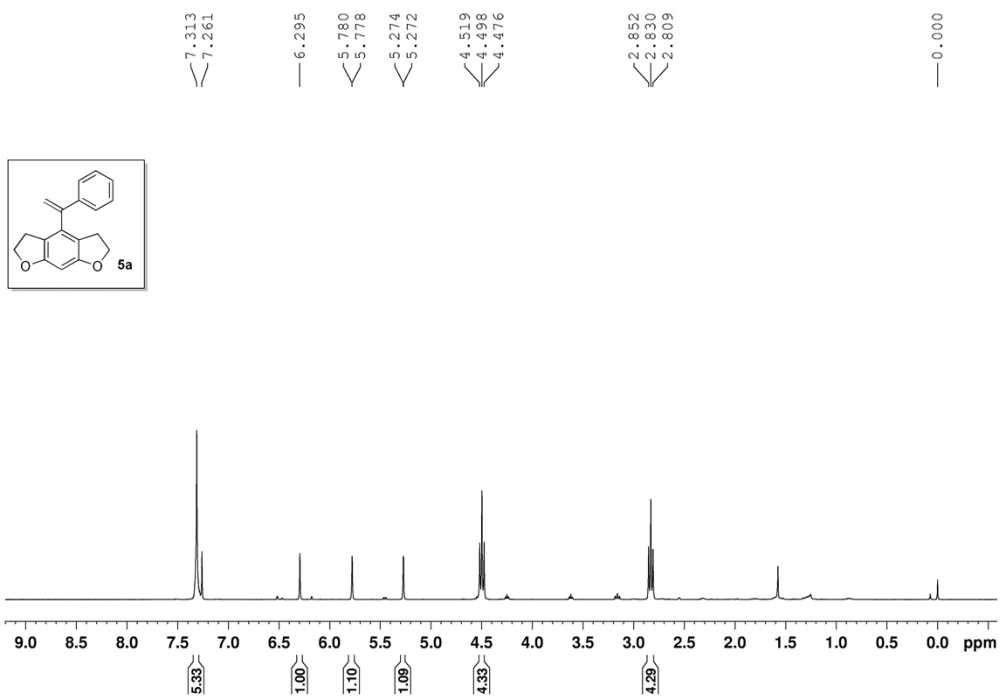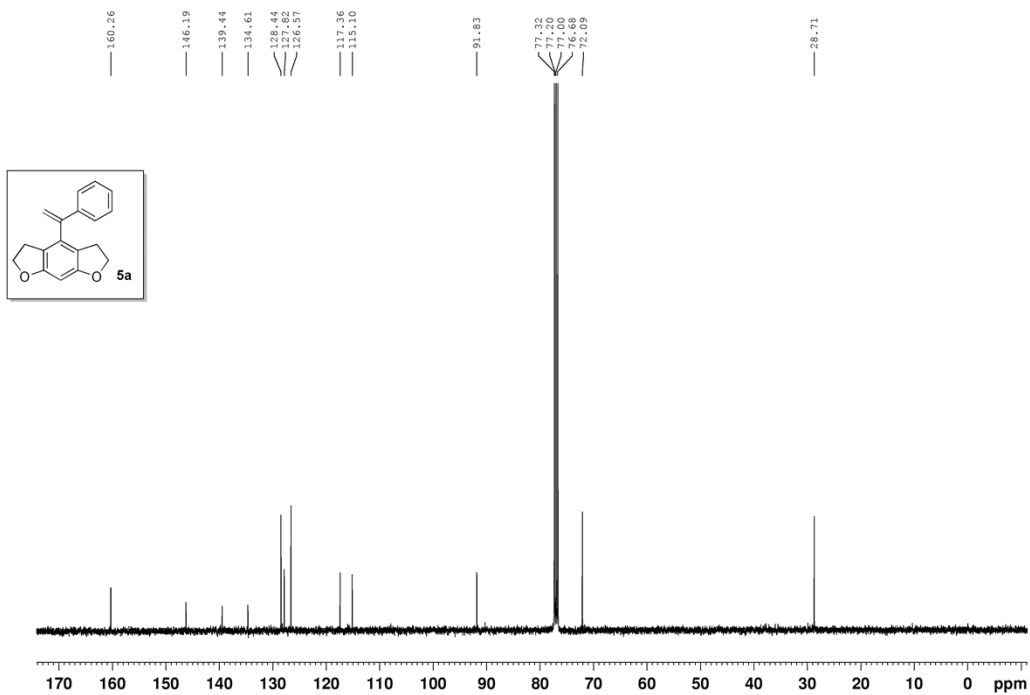



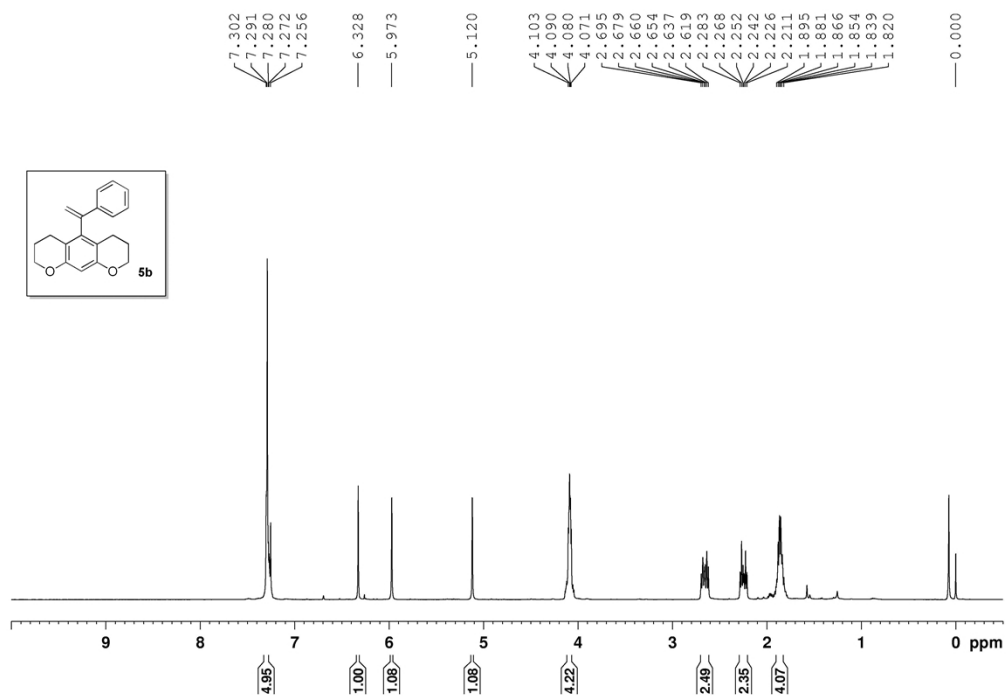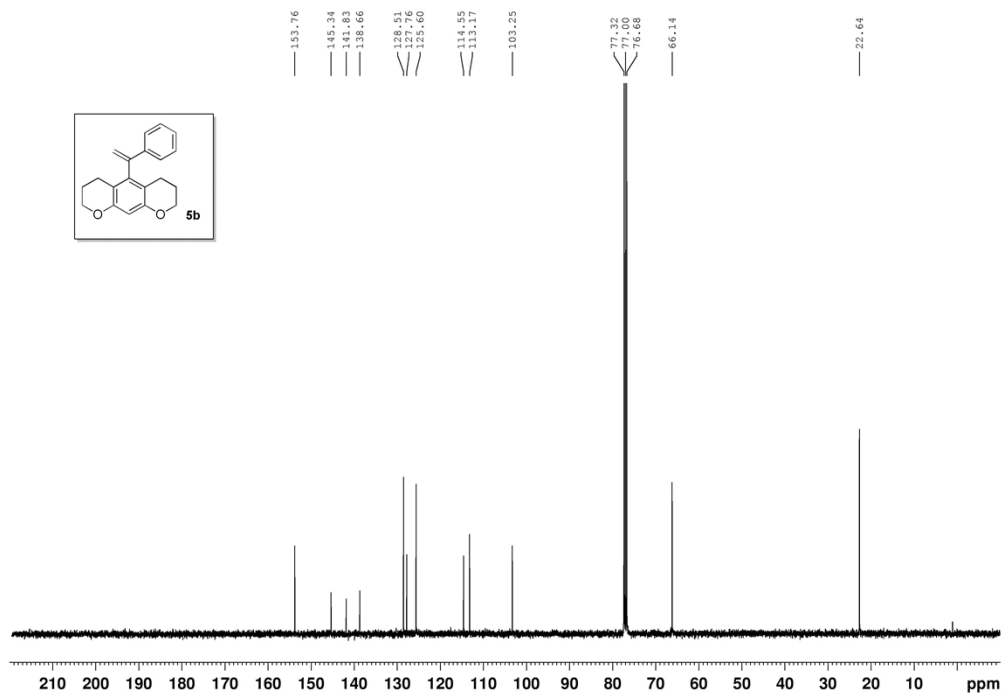

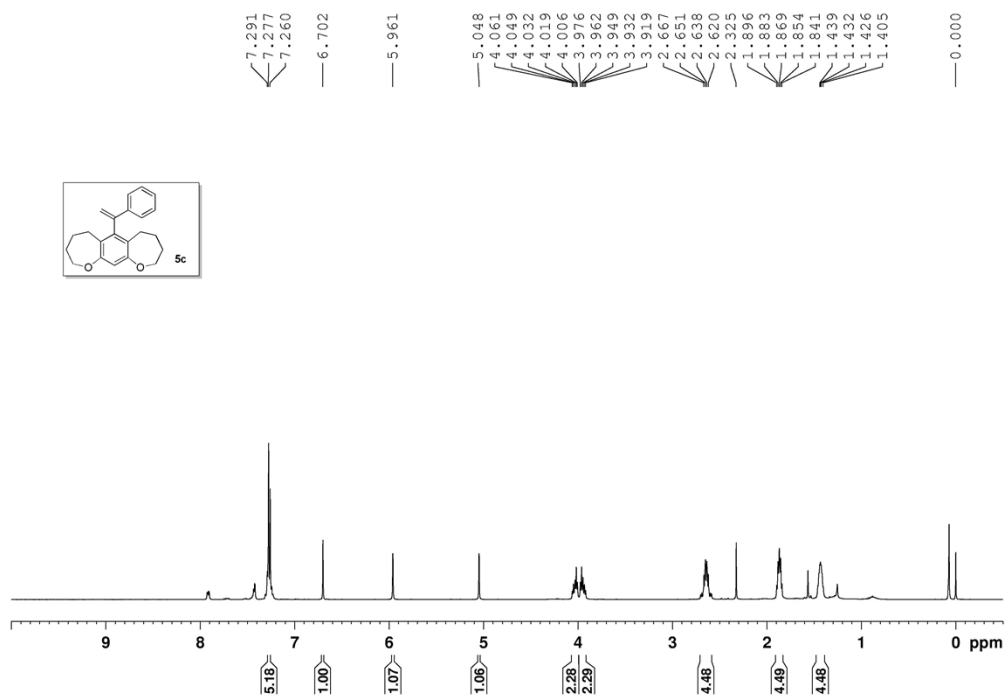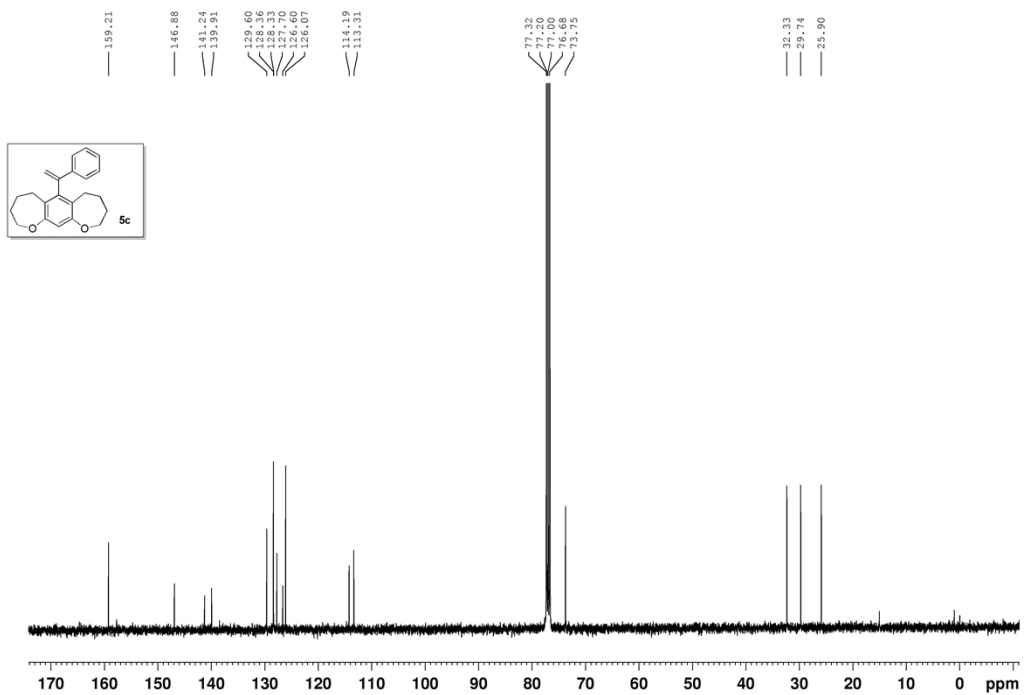

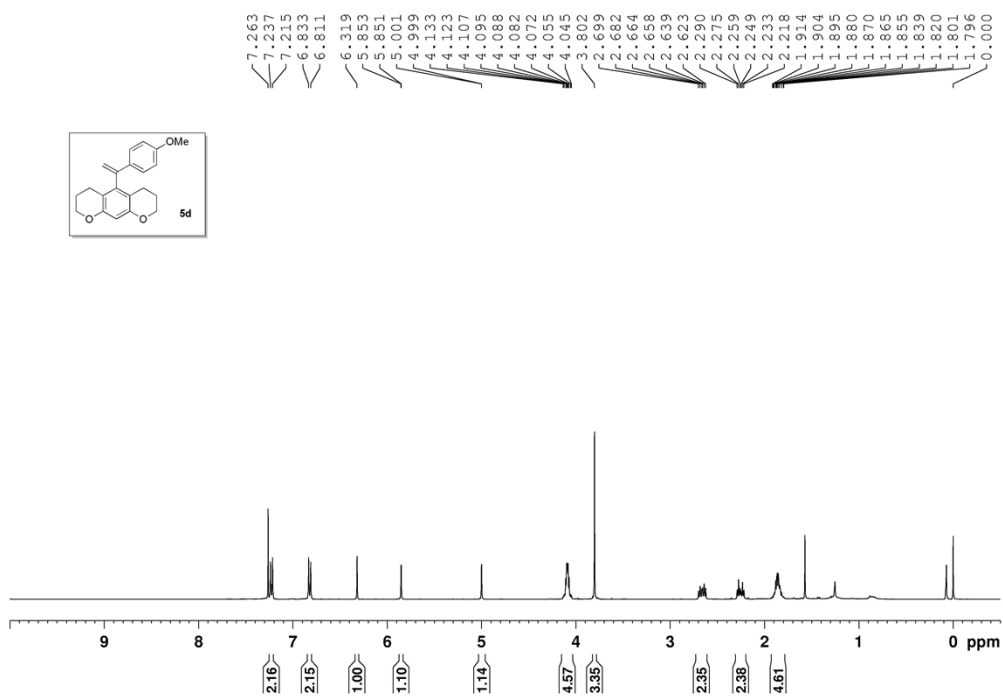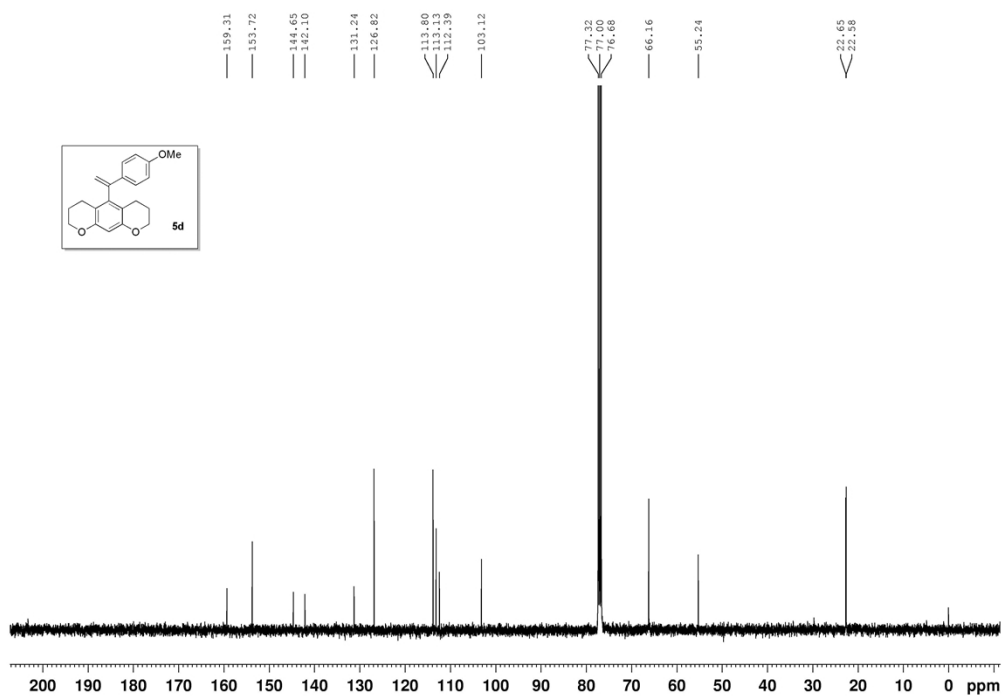

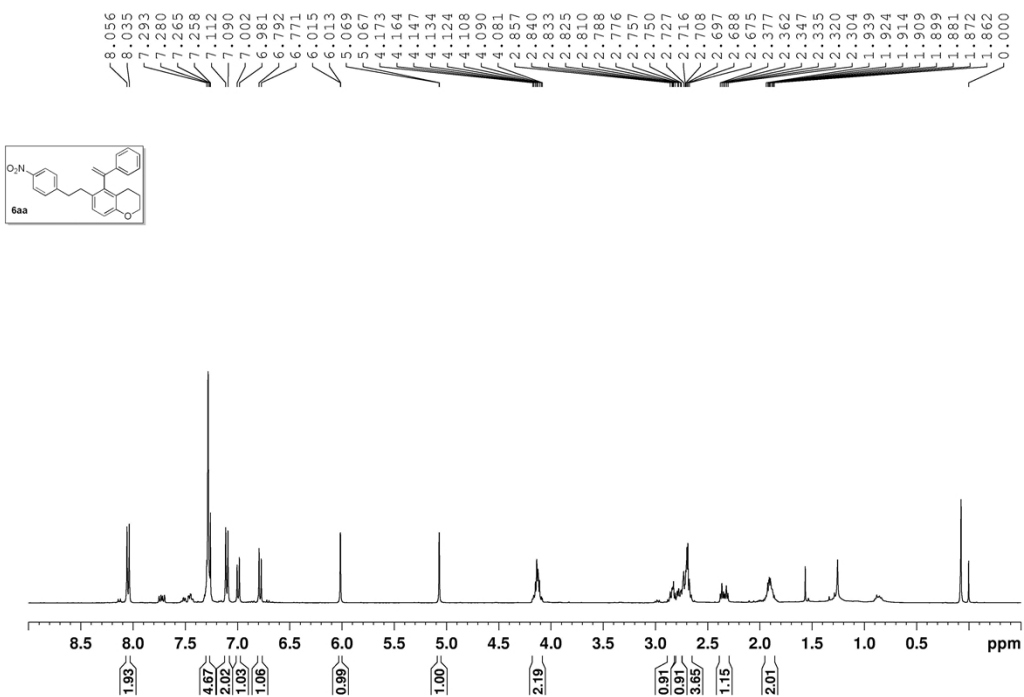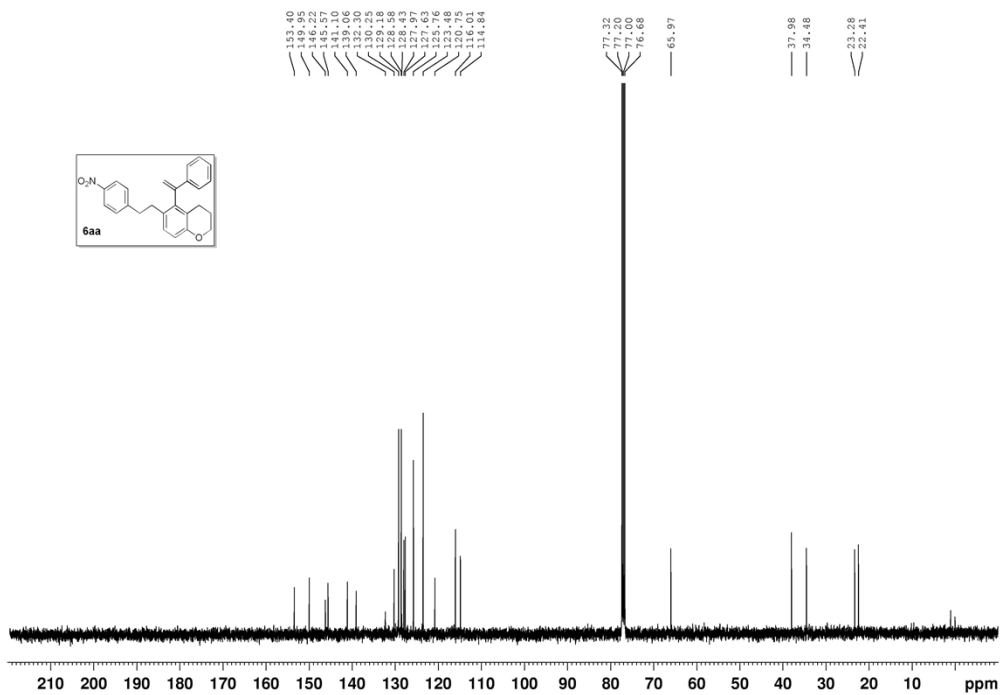

Supplement: c4cc00809j1.pdf [file c4cc00809j1.pdf]
